# Supplementary material for: Loss of the multifunctional RNA-binding protein RBM47 as a source of selectable metastatic traits in breast cancer
Source: eLife. 2014 Jun 4;3:e02734. doi: 10.7554/eLife.02734 (PMC4073284; doi:10.7554/eLife.02734)
Supplement: Supplementary file 1. — RBM47-bound alternatively spliced exons showing RBM47-dependent ΔI ≥|0.2|. DOI: http://dx.doi.org/10.7554/eLife.02734.019 [file elife02734s001.xlsx]

## Sheet: supplemental
Supplementary file 1: RBM47-bound alternatively spliced exons showing RBM47-dependent ΔI≥|0.2|.
P-value calculated by Fishers exact test as in Charizanis et al.
		Alternative Splce Location			Average Inclusion Rate				RBM47 CLIP Tags
Gene ID	Gene Symbol	Chromosome	Start	End	Control	WT #10	deltaI	p-value	in BC2 tags>5
4646	MYO6	chr6	76658966	76661696	0.022394	0.934655	0.912261	4.99755e-29	116
84068	SLC10A7	chr4	147394800	147399438	0.037037	0.815937	0.7789	0.0008877	265
1730	DIAPH2	chrX	95899808	96023372	0.0384331	0.797101	0.758668	0.000870399	861
55193	PBRM1	chr3	52559802	52571023	0.220149	0.97619	0.756042	1.83005e-06	15
23595	ORC3	chr6	88360789	88369964	0.257649	1	0.742351	7.14993e-08	11
55676	SLC30A6	chr2	32272461	32276398	0.0668213	0.762222	0.695401	0.00745425	25
94121	SYTL4	chrX	99843579	99873765	0.333333	1	0.666667	0.021978	13
80821	DDHD1	chr14	52583089	52591096	0.24864	0.905	0.65636	0.000144406	34
4659	PPP1R12A	chr12	78723502	78725240	0.0470307	0.696157	0.649126	0.00742655	30
394	ARHGAP5	chr14	31616358	31656243	0.142063	0.766667	0.624603	0.00611257	1431
84874	ZNF514	chr2	95182604	95186910	0.00709297	0.626263	0.61917	0.000761422	159
22872	SEC31A	chr4	83969176	83982657	0.00254453	0.6195	0.616956	1.36727e-85	117
22872	SEC31A	chr4	83969176	83982657	0.312159	0.875597	0.563438	1.77282e-11	117
96459	FNIP1	chr5	131072792	131080247	0.015873	0.572391	0.556518	2.61363e-05	114
54532	USP53	chr4	120358152	120386031	0.0989247	0.647436	0.548511	0.000959365	390
56243	KIAA1217	chr10	24871627	24874037	0.423077	0.939428	0.516351	0.000411251	36
51699	VPS29	chr12	109418199	109421733	0.392089	0.904951	0.512862	2.19883e-05	410
285172	FAM126B	chr2	201553370	201561388	0.335185	0.833333	0.498148	0.0423071	114
2965	GTF2H1	chr11	18302386	18311350	0.364214	0.851852	0.487638	0.0132634	16
4154	MBNL1	chr3	153645760	153648251	0.0154401	0.47967	0.46423	0.000702146	45
7267	TTC3	chr21	37450826	37453916	0.377706	0.833333	0.455628	0.000388292	27
3371	TNC	chr9	116844318	116865288	0.162892	0.603175	0.440283	0.0023311	11
5609	MAP2K7	chr19	7874838	7880780	0.00337088	0.41928	0.415909	3.95655e-12	14
120	ADD3	chr10	111880110	111883338	0.0678685	0.467606	0.399737	2.62113e-08	49
23215	PRRC2C	chr1	169824140	169827501	0.218519	0.616718	0.398199	7.08373e-15	124
960	CD44	chr11	35167957	35189571	0.34855	0.734188	0.385638	9.91384e-23	3618
22872	SEC31A	chr4	83969176	83984685	0.238152	0.614672	0.37652	1.63441e-66	148
114299	PALM2	chr9	111727161	111748505	0.635897	1	0.364103	0.00923917	37
56650	CLDND1	chr3	99722666	99724435	0.0498752	0.407515	0.35764	3.57151e-09	122
7871	SLMAP	chr3	57883655	57889933	0.407407	0.755932	0.348524	2.72005e-07	430
79612	NAA16	chr13	40803409	40827351	0.414959	0.753205	0.338246	3.49633e-05	19
55763	EXOC1	chr4	56444745	56451308	0.300725	0.62192	0.321195	3.38413e-17	69
79848	CSPP1	chr8	68160795	68166671	0.434273	0.754805	0.320532	2.9044e-17	32
22872	SEC31A	chr4	83969176	83984685	0.372165	0.689907	0.317741	1.45164e-21	148
9100	USP10	chr16	83324541	83349913	0.257519	0.565459	0.30794	0.00123574	36
9776	ATG13	chr11	46595682	46622485	0.363915	0.658586	0.294671	0.00167375	18
26258	BLOC1S6	chr15	43666868	43684983	0.553086	0.844444	0.291358	0.0458206	32
10009	ZBTB33	chrX	119268739	119276278	0.134863	0.425926	0.291063	0.0332281	1305
8555	CDC14B	chr9	98302215	98317894	0.522048	0.795455	0.273406	0.01343	63
22998	LIMCH1	chr4	41315961	41341399	0.45857	0.731892	0.273322	3.06624e-06	43
79668	PARP8	chr5	50081741	50091322	0	0.26824	0.26824	4.57967e-16	30
120	ADD3	chr10	111755783	111850595	0.743961	1	0.256039	0.000386997	29
133015	PACRGL	chr4	20315380	20323642	0.453997	0.708011	0.254014	0.0465602	49
7748	ZNF195	chr11	3338138	3340407	0.366558	0.612486	0.245928	0.00528451	47
130827	TMEM182	chr2	102747219	102799396	0.761905	1	0.238095	0.035194	62
83636	C19orf12	chr19	34883909	34897991	0.560494	0.787995	0.227501	0.0336606	66
4659	PPP1R12A	chr12	78723502	78725240	0.302678	0.512954	0.210276	0.0163853	30
26751	SH3YL1	chr2	208150	220043	0.233607	0.437407	0.2038	0.0160273	23
23595	ORC3	chr6	88360789	88368317	0.751371	0.550865	-0.200505	1.92674e-31	11
4194	MDM4	chr1	202767941	202774058	0.771979	0.563131	-0.208848	0.0392048	36
2316	FLNA	chrX	153236386	153239184	0.743425	0.527802	-0.215624	3.04984e-137	22
4179	CD46	chr1	206025586	206035480	0.535538	0.314198	-0.22134	6.70121e-31	2644
26054	SENP6	chr6	76401142	76414236	0.721196	0.497354	-0.223842	0.0207896	152
56243	KIAA1217	chr10	24865708	24874037	0.936296	0.705026	-0.23127	0.00536416	48
112849	L3HYPDH	chr14	59009331	59011250	0.714701	0.482275	-0.232426	0.000294608	359
9223	MAGI1	chr3	65403506	65414054	0.690737	0.453869	-0.236867	0.00470546	13
4194	MDM4	chr1	202767941	202774058	0.727106	0.489899	-0.237207	0.0386192	36
51571	FAM49B	chr8	130952802	130961885	0.973299	0.732083	-0.241216	7.99311e-32	378
4493	MT1E	chr16	55217191	55218522	0.872222	0.619375	-0.252847	5.30526e-09	10
51430	SUCO	chr1	170811280	170813581	0.954545	0.693573	-0.260972	0.000239565	50
286410	ATP11C	chrX	138638610	138647893	0.925926	0.660856	-0.26507	2.48765e-25	90
51444	RNF138	chr18	27947705	27958805	0.792307	0.525926	-0.266381	0.0144181	51
222235	FBXL13	chr7	102353956	102391347	1	0.723153	-0.276847	0.0155875	14
4140	MARK3	chr14	103027866	103039370	0.560794	0.276964	-0.28383	8.28241e-96	107
51426	POLK	chr5	74918606	74928758	0.960784	0.675214	-0.285571	0.0256165	73
85021	REPS1	chr6	139283866	139292927	0.705695	0.417089	-0.288607	6.57104e-26	23
7099	TLR4	chr9	119506442	119510827	0.746569	0.445166	-0.301403	0.0203242	16
55904	KMT2E	chr7	104441879	104468705	0.516708	0.194872	-0.321837	0.0372135	24
81565	NDEL1	chr17	8304051	8312195	0.506667	0.183373	-0.323294	4.7648e-12	38
23215	PRRC2C	chr1	169824140	169827501	0.794376	0.46725	-0.327126	7.85182e-13	124
56948	SDR39U1	chr14	23979828	23981497	1	0.661367	-0.338633	0.00051915	22
85021	REPS1	chr6	139283866	139292927	0.580915	0.237173	-0.343743	1.32004e-15	23
120	ADD3	chr10	111757978	111850595	0.744444	0.372549	-0.371895	1.9388e-05	29
56243	KIAA1217	chr10	24802162	24824130	0.957447	0.549375	-0.408071	5.25009e-18	16
51030	TVP23B	chr17	18633390	18641705	0.653132	0.230769	-0.422363	0.00618692	17
168451	THAP5	chr7	107991591	107997402	0.600635	0.161905	-0.43873	0.0253841	42
5352	PLOD2	chr3	147277258	147279733	0.82873	0.376984	-0.451745	1.18339e-31	163
1235	CCR6	chr6	167344290	167356112	0.75	0.265542	-0.484458	2.34192e-13	12
221395	GPR116	chr6	46929292	46931753	0.517857	0.0293707	-0.488486	6.88255e-29	60
2186	BPTF	chr17	63301394	63312893	0.869067	0.368126	-0.500941	0.000304427	27
2887	GRB10	chr7	50739011	50828626	0.910685	0.387205	-0.52348	0.00157101	33
9140	ATG12	chr5	115196197	115201359	0.994602	0.444444	-0.550157	0.00960017	85
6738	TROVE2	chr1	191295384	191311792	0.645258	0.0927073	-0.55255	0.00942061	28
80006	TRAPPC13	chr5	64984083	64990083	0.960784	0.394378	-0.566406	5.18228e-06	184
693139	MIR554	chr1	149779408	149801785	0.888889	0.31465	-0.574238	8.82807e-06	12
6249	CLIP1	chr12	121391252	121403285	0.871237	0.287986	-0.583251	6.81692e-14	83
55914	ERBB2IP	chr5	65384989	65403874	0.933841	0.344444	-0.589397	0.000353691	1713
23001	WDFY3	chr4	85864602	85873785	0.888889	0.298571	-0.590318	3.17325e-08	72
9748	SLK	chr10	105757924	105768036	0.958229	0.350143	-0.608086	5.26036e-62	102
22920	KIFAP3	chr1	168157084	168189874	0.879792	0.25384	-0.625951	1.06136e-21	265
4775	NFATC3	chr16	66782171	66818300	0.863915	0.194779	-0.669135	1.75109e-05	34
4140	MARK3	chr14	103027866	103039370	0.92015	0.242046	-0.678104	2.66786e-40	107
6885	MAP3K7	chr6	91302776	91313826	0.957561	0.275059	-0.682502	1.45144e-14	428
9043	SPAG9	chr17	46407130	46409580	0.840141	0.0713144	-0.768827	1.091e-36	42
23365	ARHGEF12	chr11	119783656	119796769	0.991111	0.184344	-0.806767	8.73619e-07	34
2744	GLS	chr2	191486163	191494026	0.921716	0.0909091	-0.830807	4.99547e-06	826
79670	ZCCHC6	chr9	88103501	88106335	1	0.127442	-0.872558	3.72476e-09	70
