# Supplementary material for: Loss of the multifunctional RNA-binding protein RBM47 as a source of selectable metastatic traits in breast cancer
Source: eLife. 2014 Jun 4;3:e02734. doi: 10.7554/eLife.02734 (PMC4073284; doi:10.7554/eLife.02734)
Supplement: Supplementary file 2. — mRNAs changed upon RBM47 reintroduction. DOI: http://dx.doi.org/10.7554/eLife.02734.020 [file elife02734s002.xlsx]

## Sheet: Sheet1
Supplementary file 2 – mRNAs changed upon RBM47 reintroduction.
	WT6		WT10		MUT3
Gene	Cor	P-value	Cor	P-value	Cor	P-value
SYS1	0.987085	0.00175854	0.999488	1.39e-05	-0.248727	0.686607
DAZAP2	0.996182	0.000283014	0.999006	3.76e-05	0.578849	0.306511
NOV	0.996696	0.000227851	0.998972	3.96e-05	-0.357854	0.554286
TMEM66	0.968105	0.00680494	0.998557	6.58e-05	-0.69378	0.1938
C17orf58	0.962908	0.00852745	0.998426	7.5e-05	0.383433	0.524039
ZNF643	0.99642	0.000256958	0.998196	9.19e-05	-0.103451	0.868517
ARFGAP3	0.970506	0.00605346	0.997891	0.000116242	0.658955	0.226454
DKK1	0.967764	0.00691396	0.997764	0.00012688	0.253494	0.680732
NRBF2	0.974626	0.00483341	0.997745	0.000128528	0.568843	0.316944
DSCR3	0.973436	0.00517655	0.997189	0.00017881	0.763402	0.133138
HACL1	0.983266	0.00259195	0.997164	0.000181258	-0.381318	0.526527
PRKCH	0.988019	0.00157138	0.996852	0.000211912	0.505621	0.384816
STX3	0.968734	0.00660535	0.996782	0.000219024	-0.0511617	0.934887
RALB	0.979823	0.00343017	0.996727	0.000224618	0.552004	0.3347
GNPDA1	0.997227	0.000175212	0.996496	0.000248816	-0.302016	0.62139
SLC35B3	0.970984	0.0059073	0.996353	0.000264235	-0.643868	0.241029
CTAGE5	0.964811	0.00788188	0.996158	0.000285751	-0.604366	0.280319
CIAO1	0.982823	0.00269557	0.995955	0.00030861	0.268244	0.662602
C11orf54	0.963893	0.0081914	0.995787	0.000328026	-0.295816	0.628923
SARDH	0.98626	0.00192932	0.995709	0.000337176	0.772857	0.125431
GABARAPL1	0.994721	0.000460007	0.995444	0.000368913	0.698521	0.189467
C4orf52	0.962656	0.00861411	0.995441	0.000369211	-0.325198	0.593363
HBP1	0.997023	0.000194885	0.995249	0.000392882	0.450519	0.446424
SLC50A1	0.997115	0.000185964	0.995201	0.00039881	0.298404	0.625777
SAT1	0.989479	0.00129332	0.994666	0.000467275	-0.394812	0.510694
IFNGR2	0.977162	0.00412881	0.994388	0.000504264	-0.698338	0.189634
TMEM50B	0.985785	0.00203015	0.994244	0.000523722	-0.304425	0.618466
CASP7	0.990468	0.0011156	0.994217	0.000527461	-0.0767495	0.902376
CAT	0.976101	0.00441905	0.994167	0.000534315	-0.559255	0.327025
GLB1	0.968359	0.00672406	0.993945	0.000565136	0.171971	0.782124
SLC31A2	0.997778	0.000125698	0.993698	0.000599925	0.716638	0.173167
C9orf95	0.999835	2.55e-06	0.9934	0.000643011	0.381879	0.525867
IL8	0.988761	0.00142794	0.99275	0.000740183	0.627923	0.256696
FAM49A	0.986029	0.00197806	0.992461	0.000784935	0.35027	0.563318
STAMBP	0.987711	0.00163233	0.991933	0.000868635	-0.158669	0.798828
YPEL5	0.997525	0.000147786	0.991702	0.000906329	0.723226	0.167345
HDHD1	0.999335	2.06e-05	0.991173	0.000994285	-0.627653	0.256964
SLC16A6	0.986367	0.00190685	0.99078	0.0010612	-0.577331	0.308089
SLC35D2	0.996677	0.000229816	0.990562	0.00109914	-0.633361	0.251323
ALG2	0.960182	0.00948077	0.986965	0.00178296	0.749325	0.144863
TMEM206	0.991742	0.000899693	0.986749	0.00182745	0.421063	0.480178
TNFSF10	0.988928	0.00139617	0.986624	0.00185341	0.245344	0.690781
OSBPL2	0.991211	0.000987772	0.986392	0.00190166	0.549717	0.337131
MAP3K8	0.973883	0.00504686	0.986196	0.00194282	-0.777136	0.121987
MAP1LC3B2	0.976231	0.00438316	0.985942	0.00199663	-0.620991	0.26359
CBR1	0.961721	0.00893844	0.985488	0.00209399	0.783902	0.116602
BTG1	0.975522	0.00458023	0.985145	0.00216862	-0.414207	0.48811
AUH	0.979067	0.0036242	0.985031	0.00219348	-0.304016	0.618963
MAP1LC3B	0.981397	0.00303725	0.984184	0.00238202	0.0819136	0.895821
BEST1	0.973463	0.00516856	0.98369	0.00249427	0.592961	0.29195
PEX11B	0.995706	0.0003376	0.983532	0.00253054	-0.102532	0.869681
DPH3	0.968595	0.00664923	0.983193	0.00260903	-0.197406	0.750297
GMPR2	0.990764	0.0010641	0.98268	0.00272914	0.197657	0.749984
CHMP1B	0.995108	0.000410429	0.982526	0.00276563	0.593962	0.290924
ACOX3	0.973141	0.00526263	0.981832	0.00293158	0.392566	0.513321
SDR16C5	0.976572	0.00428943	0.981694	0.00296511	0.365415	0.545311
HMGCL	0.993909	0.00057013	0.981575	0.00299396	-0.402864	0.501292
IL24	0.980911	0.00315684	0.980998	0.00313528	0.45749	0.438516
MXI1	0.994561	0.000481059	0.980743	0.00319864	0.170259	0.784272
ZNF252	0.973428	0.00517869	0.979721	0.00345593	-0.0434804	0.944656
GLOD4	0.988237	0.00152878	0.977041	0.00416157	-0.47735	0.416162
LOC643837	0.980516	0.00325514	0.976088	0.00442285	-0.594289	0.29059
STYK1	0.976091	0.00442189	0.975571	0.0045666	0.5049	0.385608
ABCD4	0.981285	0.00306466	0.975263	0.00465293	-0.591526	0.293422
HTATIP2	0.993934	0.000566596	0.973962	0.0050239	0.470047	0.424351
SLC9A3R1	0.996352	0.000264371	0.973855	0.00505472	-0.135326	0.828225
COA5	0.970207	0.00614538	0.973351	0.00520143	-0.572204	0.31343
LHFPL2	0.979648	0.00347472	0.972932	0.00532415	0.733834	0.158094
SQSTM1	0.991807	0.000889139	0.972801	0.0053628	0.638599	0.246177
TUBB1	0.997052	0.00019208	0.972554	0.00543583	-0.303802	0.619223
TLCD2	0.977143	0.00413387	0.971655	0.00570429	-0.442753	0.45527
PNRC1	0.989343	0.00131847	0.971614	0.00571665	0.773622	0.124813
HERPUD2	0.99712	0.000185469	0.971325	0.00580367	0.560796	0.325399
CCRL2	0.995195	0.000399491	0.970943	0.00591977	0.625524	0.259076
N6AMT1	0.973763	0.00508152	0.969667	0.00631265	0.773785	0.124681
C6orf147	0.967156	0.00711006	0.969646	0.00631942	-0.300525	0.623201
ZNF75A	0.977872	0.00393814	0.969213	0.00645464	-0.795065	0.107878
LOC338799	0.997346	0.000164093	0.968569	0.0066576	-0.651704	0.233428
MSMO1	0.972271	0.0055198	0.968427	0.0067024	-0.7004	0.187756
DKK3	0.985295	0.00213588	0.967588	0.00697074	-0.542704	0.344611
TMEM9	0.9881	0.00155551	0.967462	0.00701119	-0.0754064	0.904081
NICN1	0.986092	0.00196493	0.967447	0.00701592	-0.565927	0.320001
SDCCAG8	0.980414	0.00328078	0.967174	0.00710419	-0.161907	0.794758
SLC35E2	0.977767	0.00396628	0.966669	0.00726812	-0.641789	0.243056
PROCR	0.99112	0.00100315	0.966343	0.00737456	0.487896	0.404402
PLIN2	0.995659	0.000343152	0.966108	0.00745186	0.717714	0.172213
MAGED2	0.993146	0.000680435	0.965455	0.00766726	0.26857	0.662202
KCNJ15	0.994639	0.000470869	0.964988	0.00782286	0.562423	0.323685
AMDHD1	0.965281	0.00772506	0.964858	0.0078663	-0.26448	0.667221
FAM103A1	0.995385	0.000376107	0.964764	0.00789762	-0.214194	0.72938
S1PR1	0.972298	0.00551185	0.964629	0.00794301	-0.0341212	0.956564
C6orf57	0.992531	0.000773935	0.963793	0.00822521	-0.0853626	0.891445
TOR1A	0.988471	0.00148344	0.963571	0.0083009	0.789295	0.112362
C5orf45	0.995644	0.000344915	0.963323	0.00838537	0.32601	0.592386
EPB41L4A	0.967908	0.00686808	0.962254	0.00875332	0.31824	0.601752
MED29	0.985139	0.00216984	0.961656	0.00896128	0.669121	0.216776
NDUFAF1	0.960394	0.0094053	0.961485	0.0090208	0.421406	0.479783
PLA2G4C	0.966015	0.00748238	0.961011	0.00918743	0.634337	0.250362
FRZB	0.96243	0.0086924	0.960613	0.0093279	0.260626	0.671957
SDSL	0.992276	0.000813944	0.959091	0.00987142	0.295037	0.629871
DERA	0.970012	0.00620556	0.958893	0.0099428	-0.796276	0.106945
SPHK1	0.998975	3.94e-05	0.958803	0.00997554	-0.12064	0.84677
RPSAP52	-0.972148	0.00555637	-0.961406	0.00904865	-0.752272	0.142384
IRS2	-0.990721	0.00107153	-0.961416	0.00904522	0.627788	0.256831
TGFBR2	-0.958751	0.00999428	-0.961751	0.00892819	0.687091	0.199961
BUB1	-0.969273	0.00643585	-0.965031	0.0078085	0.0492604	0.937305
NUP133	-0.982886	0.00268057	-0.965827	0.00754427	0.0972546	0.876367
CUL1	-0.97079	0.00596634	-0.966203	0.00742064	0.610989	0.273622
C20orf11	-0.976799	0.00422734	-0.966293	0.00739096	0.609819	0.274802
POLR3D	-0.974319	0.00492113	-0.966458	0.00733698	0.142976	0.818579
WNT7B	-0.983206	0.00260596	-0.966614	0.00728611	0.664528	0.221134
GJA1	-0.96584	0.00754011	-0.967073	0.00713678	0.0685838	0.912745
CCDC165	-0.964598	0.00795354	-0.967252	0.00707903	-0.290317	0.635617
PAXIP1	-0.967265	0.00707473	-0.967373	0.00703972	-0.304798	0.618014
DPY19L2P2	-0.968563	0.00665949	-0.967383	0.00703669	-0.476814	0.416762
FAM123B	-0.960419	0.00939656	-0.969063	0.0065018	0.0921591	0.882826
BNIP2	-0.963262	0.00840633	-0.969634	0.00632296	-0.46624	0.428634
GTPBP4	-0.999418	1.69e-05	-0.97031	0.00611376	0.0135832	0.982706
CEP170	-0.978733	0.00371111	-0.97181	0.00565752	0.477039	0.41651
FANCG	-0.974857	0.00476781	-0.972608	0.00541978	0.505597	0.384843
IFT74	-0.995845	0.000321278	-0.973127	0.0052668	-0.28839	0.637966
EXO1	-0.982524	0.00276604	-0.974393	0.00490008	-0.105788	0.865558
CDCA7L	-0.986237	0.00193411	-0.974596	0.00484194	-0.604271	0.280415
RPA1	-0.968929	0.00654376	-0.975681	0.00453579	0.4141	0.488234
KDM1A	-0.979768	0.00344409	-0.975986	0.00445104	0.326003	0.592395
ADNP2	-0.96872	0.0066098	-0.975996	0.00444833	0.41637	0.485604
MCM7	-0.969645	0.0063196	-0.976362	0.00434715	-0.71412	0.175408
FAM120A	-0.991759	0.000896874	-0.977494	0.00403947	0.676057	0.210241
TCOF1	-0.959905	0.00957943	-0.978302	0.00382422	0.239161	0.698419
XPO5	-0.963102	0.00846084	-0.979026	0.00363489	0.0425452	0.945846
MAP7D3	-0.994507	0.000488283	-0.979255	0.00357559	0.717824	0.172115
TTF2	-0.958872	0.00995057	-0.97965	0.00347408	0.162813	0.79362
SRF	-0.967024	0.00715287	-0.979803	0.00343502	-0.234237	0.704511
CCNJL	-0.979159	0.00360037	-0.980585	0.00323789	-0.321686	0.597594
TSR1	-0.984392	0.00233531	-0.980926	0.00315327	-0.690226	0.197067
CASC3	-0.958774	0.00998575	-0.980966	0.00314328	0.753082	0.141705
KAT7	-0.969388	0.00639966	-0.981097	0.003111	0.786119	0.114854
RRP1B	-0.974178	0.00496155	-0.981378	0.00304197	-0.0665512	0.915327
SFPQ	-0.999114	3.16e-05	-0.981895	0.00291632	0.533705	0.354268
EXOSC10	-0.966559	0.00730407	-0.981991	0.0028932	0.537675	0.35
SUPT16H	-0.974371	0.00490626	-0.982169	0.00285068	0.794769	0.108108
FANCA	-0.963911	0.00818534	-0.982291	0.00282131	-0.170964	0.783387
WDR5	-0.975985	0.00445136	-0.982901	0.00267716	-0.241286	0.695793
GAS6	-0.962702	0.00859846	-0.982949	0.00266599	0.338238	0.577701
DLC1	-0.988336	0.00150951	-0.983072	0.00263716	-0.631325	0.253331
LMNB2	-0.962696	0.00860032	-0.983224	0.00260175	0.319807	0.59986
CDK2	-0.991665	0.000912397	-0.983258	0.00259393	0.794211	0.108539
PRPF4	-0.973543	0.00514524	-0.983285	0.00258759	-0.157322	0.800521
F3	-0.980845	0.00317325	-0.983371	0.00256768	0.321831	0.59742
DNMBP	-0.967312	0.00705966	-0.983924	0.00244085	-0.661158	0.224347
SF1	-0.972247	0.00552679	-0.984178	0.00238347	0.538476	0.34914
SLC20A1	-0.968086	0.00681115	-0.98447	0.0023178	0.323484	0.595428
NCL	-0.99301	0.000700867	-0.9845	0.00231102	-0.0691696	0.912001
SLC29A1	-0.982534	0.00276366	-0.984868	0.00222945	0.718174	0.171805
PSPC1	-0.997348	0.000163888	-0.984905	0.00222119	0.573394	0.312188
KHSRP	-0.96539	0.00768894	-0.984908	0.00222054	0.632959	0.251719
POGK	-0.990247	0.00115454	-0.985255	0.00214454	-0.0633711	0.919368
TFAP4	-0.959047	0.0098873	-0.985512	0.00208886	-0.757615	0.137922
ARL2BP	-0.963016	0.00849049	-0.985609	0.00206796	0.375449	0.533444
DIS3L	-0.985819	0.00202292	-0.986563	0.00186606	-0.317279	0.602912
CPSF7	-0.959106	0.00986603	-0.986912	0.00179392	0.655429	0.229838
RUNX1	-0.964888	0.00785621	-0.987348	0.00170516	0.776994	0.122101
HP1BP3	-0.960555	0.00934838	-0.988318	0.00151302	-0.207646	0.737529
CBX1	-0.977131	0.0041373	-0.988365	0.00150389	-0.17483	0.778538
ALDH18A1	-0.959968	0.009557	-0.988689	0.00144158	0.43739	0.461402
NCAPG2	-0.978731	0.00371156	-0.988821	0.00141638	-0.378591	0.52974
PYGL	-0.989024	0.0013781	-0.989975	0.00120306	-0.536362	0.351409
HNRNPM	-0.9837	0.00249199	-0.990005	0.00119773	0.254682	0.679269
CENPO	-0.968959	0.00653448	-0.990221	0.00115917	0.491007	0.400947
PDCD7	-0.973574	0.00513629	-0.990334	0.00113906	0.0608438	0.922579
BMS1	-0.974021	0.00500678	-0.991365	0.000961927	0.767854	0.129492
CDCA5	-0.968444	0.00669714	-0.991389	0.000957988	0.696889	0.190955
SLC2A1	-0.968686	0.00662046	-0.991558	0.000929952	0.074663	0.905024
CSNK1A1	-0.980215	0.00333066	-0.992942	0.000711036	-0.044666	0.943148
PKP4	-0.978306	0.00382328	-0.99295	0.000709858	0.223267	0.718108
KIFC1	-0.961565	0.00899305	-0.993623	0.000610729	0.333429	0.583468
MCM3	-0.968858	0.00656605	-0.994033	0.000552805	0.725743	0.165137
SORD	-0.995848	0.000320974	-0.994106	0.000542691	-0.610235	0.274383
MYBL2	-0.96109	0.0091596	-0.994452	0.00049566	0.690803	0.196536
TTPAL	-0.961197	0.00912209	-0.995128	0.000407971	0.142992	0.818559
KLC1	-0.960987	0.00919569	-0.99538	0.000376706	0.782235	0.117922
PIP5K1A	-0.960399	0.00940348	-0.995427	0.000370945	0.767282	0.129959
NFIA	-0.988291	0.00151823	-0.995507	0.000361297	0.433024	0.466407
FAM171A1	-0.973527	0.00515012	-0.995687	0.000339819	-0.0404744	0.94848
SLC43A3	-0.973464	0.0051683	-0.996176	0.000283674	0.36852	0.541634
NAP1L4	-0.967297	0.00706422	-0.996403	0.000258805	0.572686	0.312927
NAT10	-0.95967	0.00966354	-0.996708	0.00022659	0.626602	0.258007
DCLRE1B	-0.960825	0.00925301	-0.997149	0.000182632	0.0567736	0.927752
ILF3	-0.959862	0.00959461	-0.997336	0.000165023	0.345359	0.56918
WHSC1	-0.968068	0.00681693	-0.997343	0.000164364	0.200691	0.746198
PWP2	-0.972316	0.00550626	-0.997413	0.000157911	-0.3015	0.622016
PABPC1	-0.990327	0.00114045	-0.998408	7.62e-05	0.550882	0.335892
TFDP1	-0.993751	0.000592424	-0.998759	5.25e-05	0.345883	0.568554
SSRP1	-0.977184	0.00412297	-0.999028	3.64e-05	0.654223	0.230998
