# Supplementary material for: Loss of the multifunctional RNA-binding protein RBM47 as a source of selectable metastatic traits in breast cancer
Source: eLife. 2014 Jun 4;3:e02734. doi: 10.7554/eLife.02734 (PMC4073284; doi:10.7554/eLife.02734)
Supplement: Supplementary file 3. — RBM47 bound transcripts. DOI: http://dx.doi.org/10.7554/eLife.02734.021 [file elife02734s003.xlsx]

## Sheet: Updated
Supplemenary file 3 – RBM47 bound transcripts.
		Total Genic RBM47 CLIP Tags
Gene ID	Gene symbol	in Clusters (BC2 tags≥10)	Genic length	Tags/length	Rank (tags/length)
3576	IL8	17079	1661	10.2824	1
22943	DKK1	16208	1817	8.9202	2
378938	MALAT1	72767	8356	8.70835	3
283131	TncRNA	89685	14627	6.13147	4
821	CANX	24791	4958	5.0002	5
1490	CTGF	10429	2372	4.39671	6
5552	SRGN	6956	2155	3.22784	7
27063	ANKRD1	6088	1974	3.08409	8
57142	RTN4	8187	2814	2.90938	9
567	B2M	2963	1167	2.53899	10
26808	SNORD42B	147	67	2.19403	11
4312	MMP1	4240	1973	2.14901	12
7009	TEGT	7102	3407	2.08453	13
2152	F3	4244	2154	1.97029	14
51014	TMED7	5791	2940	1.96973	15
10959	TMED2	4209	2169	1.94053	16
6782	HSPA13	7048	3986	1.76819	17
54407	SLC38A2	8356	4794	1.74301	18
7078	TIMP3	9503	5490	1.73097	19
813	CALU	5784	3347	1.72811	20
23204	ARL6IP1	3888	2272	1.71127	21
23657	SLC7A11	16406	9666	1.69729	22
114908	TMEM123	6005	3590	1.6727	23
7431	VIM	3038	1849	1.64305	24
10175	CNIH	2307	1436	1.60655	25
23471	TRAM1	4212	2793	1.50806	26
81539	SLC38A1	12866	8675	1.48311	27
56889	TM9SF3	9796	6672	1.46823	28
50999	TMED5	5533	3964	1.39581	29
6747	SSR3	4312	3121	1.38161	30
90411	MCFD2	5636	4126	1.36597	31
55754	TMEM30A	5942	4389	1.35384	32
22822	PHLDA1	7975	5913	1.34872	33
7057	THBS1	7620	5694	1.33825	34
4907	NT5E	5034	3872	1.3001	35
8754	ADAM9	5231	4027	1.29898	36
6781	STC1	4966	3888	1.27726	37
481	ATP1B1	2783	2213	1.25757	38
55161	TMEM33	3303	2692	1.22697	39
51232	CRIM1	6823	5584	1.22188	40
6745	SSR1	11634	9871	1.1786	41
3998	LMAN1	3179	2755	1.1539	42
92140	MTDH	4265	3736	1.1416	43
5621	PRNP	3127	2740	1.14124	44
79572	ATP13A3	10344	9183	1.12643	45
351	APP	4044	3600	1.12333	46
960	CD44	5079	4603	1.10341	47
57515	SERINC1	3437	3142	1.09389	48
5055	SERPINB2	2738	2530	1.08221	49
60481	ELOVL5	3840	3692	1.04009	50
10972	TMED10	4390	4245	1.03416	51
7905	REEP5	3069	2981	1.02952	52
1982	EIF4G2	4532	4503	1.00644	53
2919	CXCL1	1110	1126	0.98579	54
9069	CLDN12	3453	3540	0.975424	55
6646	SOAT1	3157	3314	0.952625	56
3638	INSIG1	2837	2994	0.947562	57
4189	DNAJB9	2221	2371	0.936736	58
1604	CD55	2426	2623	0.924895	59
7077	TIMP2	3515	3826	0.918714	60
4179	CD46	2748	3020	0.909934	61
10424	PGRMC2	1645	1849	0.88967	62
2739	GLO1	1746	2050	0.851707	63
2131	EXT1	2748	3367	0.816157	64
2195	FAT	11911	14824	0.803494	65
27125	AFF4	7892	9840	0.802033	66
10269	ZMPSTE24	2529	3154	0.801839	67
221035	REEP3	1743	2182	0.798808	68
55970	GNG12	3470	4346	0.798435	69
7529	YWHAB	1853	2323	0.797675	70
163590	TOR1AIP2	2436	3054	0.797642	71
445815	PALM2-AKAP2	3773	4743	0.795488	72
3572	IL6ST	2550	3228	0.789963	73
7805	LAPTM5	1616	2062	0.783705	74
7037	TFRC	4096	5228	0.783474	75
10857	PGRMC1	1406	1866	0.753483	76
9403	SEP15	1325	1776	0.746059	77
8763	CD164	2220	3009	0.737787	78
3930	LBR	2948	4006	0.735896	79
9445	ITM2B	1146	1561	0.734145	80
334	APLP2	3555	4848	0.733292	81
11014	KDELR2	2085	2873	0.725722	82
558	AXL	3233	4470	0.723266	83
4170	MCL1	2847	3999	0.711928	84
3685	ITGAV	4907	7022	0.698804	85
5885	RAD21	2546	3649	0.697725	86
23603	CORO1C	2649	3817	0.694001	87
3655	ITGA6	3991	5814	0.686447	88
27020	NPTN	1436	2093	0.686097	89
79901	CYBRD1	2989	4357	0.686022	90
4131	MAP1B	7961	11896	0.669217	91
81542	TXNDC1	2654	4070	0.652088	92
7357	UGCG	1082	1667	0.64907	93
7296	TXNRD1	3968	6146	0.645623	94
79646	PANK3	2158	3359	0.642453	95
57552	AADACL1	2766	4313	0.641317	96
9517	SPTLC2	4668	7287	0.640593	97
54206	ERRFI1	1909	3000	0.636333	98
85465	SELI	5168	8133	0.635436	99
7812	CSDE1	2562	4055	0.631813	100
10550	ARL6IP5	1332	2128	0.62594	101
2012	EMP1	1718	2749	0.624955	102
56650	CLDND1	2097	3372	0.621886	103
9741	LAPTM4A	883	1447	0.610228	104
25932	CLIC4	2620	4304	0.608736	105
3552	IL1A	1776	2928	0.606557	106
440026	TMEM41B	2391	3957	0.604246	107
6732	SRPK1	2869	4790	0.598956	108
3799	KIF5B	3527	5897	0.598101	109
160418	TMTC3	2967	4971	0.596862	110
2589	GALNT1	2671	4490	0.594878	111
131566	DCBLD2	3827	6437	0.594532	112
6319	SCD	3227	5472	0.58973	113
54918	CMTM6	1980	3366	0.588235	114
5501	PPP1CC	1322	2272	0.581866	115
2150	F2RL1	1660	2862	0.580014	116
6385	SDC4	1513	2612	0.57925	117
84061	MAGT1	2246	3895	0.576637	118
3988	LIPA	1524	2678	0.569081	119
10955	SERINC3	1578	2780	0.567626	120
7184	HSP90B1	1749	3091	0.565836	121
857	CAV1	1710	3028	0.564729	122
55327	LIN7C	2627	4671	0.562406	123
7913	DEK	1623	2889	0.561786	124
121457	IKIP	2159	3859	0.559471	125
51144	HSD17B12	1424	2565	0.555166	126
3423	IDS	3224	5839	0.552149	127
214	ALCAM	2981	5399	0.552139	128
9804	TOMM20	1794	3258	0.550645	129
1295	COL8A1	1419	2596	0.54661	130
51109	RDH11	1389	2580	0.538372	131
57532	NUFIP2	5779	10880	0.531158	132
90488	C12orf23	1690	3182	0.531113	133
6400	SEL1L	4130	7789	0.530235	134
805	CALM2	584	1103	0.529465	135
102	ADAM10	2768	5240	0.528244	136
10618	TGOLN2	3642	6897	0.528056	137
6856	SYPL1	1195	2266	0.527361	138
10135	NAMPT	3305	6272	0.526945	139
148867	SLC30A7	3443	6597	0.521904	140
490	ATP2B1	3526	6779	0.520136	141
56951	C5orf15	1214	2350	0.516596	142
4257	MGST1	585	1140	0.513158	143
5954	RCN1	1267	2504	0.50599	144
390	RND3	1404	2775	0.505946	145
2683	B4GALT1	2051	4071	0.503807	146
80315	CPEB4	3859	7694	0.50156	147
122786	FRMD6	3496	6972	0.501434	148
51322	WAC	1433	2885	0.496707	149
64778	FNDC3B	3364	6813	0.493762	150
6541	SLC7A1	3520	7239	0.486255	151
488	ATP2A2	3966	8204	0.483423	152
51669	TMEM66	965	1998	0.482983	153
5366	PMAIP1	935	1936	0.482955	154
1829	DSG2	2725	5653	0.482045	155
372	ARCN1	1861	3910	0.475959	156
51495	PTPLAD1	1530	3226	0.474272	157
5534	PPP3R1	1427	3015	0.4733	158
378	ARF4	840	1779	0.472175	159
10130	PDIA6	1555	3303	0.470784	160
84919	PPP1R15B	2483	5275	0.470711	161
26986	PABPC1	1363	2901	0.469838	162
30001	ERO1L	1545	3296	0.46875	163
23576	DDAH1	2013	4317	0.466296	164
51170	HSD17B11	872	1873	0.465563	165
80267	EDEM3	3033	6538	0.463903	166
55432	YOD1	3020	6521	0.463119	167
51280	GOLM1	1496	3267	0.457912	168
387	RHOA	879	1925	0.456623	169
57003	CCDC47	1553	3420	0.454094	170
5500	PPP1CB	2264	4993	0.453435	171
5879	RAC1	1053	2357	0.446754	172
54741	LEPROT	459	1029	0.446064	173
136319	MTPN	1666	3742	0.445216	174
55914	ERBB2IP	3079	6916	0.4452	175
5093	PCBP1	726	1632	0.444853	176
9908	G3BP2	1934	4376	0.441956	177
7056	THBD	1781	4032	0.441716	178
3688	ITGB1	2257	5114	0.441338	179
57708	MIER1	2461	5586	0.440566	180
64430	C14orf135	1725	3937	0.438151	181
444	ASPH	2730	6294	0.433746	182
57181	SLC39A10	2307	5322	0.433484	183
57823	SLAMF7	1165	2696	0.432122	184
55454	CSGALNACT2	1608	3723	0.43191	185
4893	NRAS	1841	4301	0.42804	186
811	CALR	853	2009	0.424589	187
2764	GMFB	1730	4112	0.42072	188
754	PTTG1IP	1140	2711	0.420509	189
2149	F2R	1449	3457	0.41915	190
6867	TACC1	3414	8155	0.418639	191
2673	GFPT1	1291	3086	0.418341	192
54749	EPDR1	1080	2598	0.415704	193
1122	CHML	2936	7066	0.415511	194
1021	CDK6	4808	11584	0.415055	195
10370	CITED2	800	1929	0.414723	196
10905	MAN1A2	2232	5392	0.413947	197
23516	SLC39A14	1920	4641	0.413704	198
10672	GNA13	1951	4719	0.413435	199
571	BACH1	2743	6645	0.412792	200
55969	C20orf24	492	1199	0.410342	201
55334	SLC39A9	1238	3018	0.410205	202
7534	YWHAZ	2039	4972	0.410097	203
9076	CLDN1	1404	3429	0.409449	204
84168	ANTXR1	2963	7252	0.408577	205
54928	IMPAD1	2916	7227	0.403487	206
80762	NDFIP1	1426	3535	0.403395	207
9188	DDX21	1785	4467	0.399597	208
3992	FADS1	1626	4094	0.397167	209
659	BMPR2	4793	12074	0.396969	210
3091	HIF1A	1566	3949	0.396556	211
58505	DC2	432	1091	0.395967	212
11010	GLIPR1	1538	3888	0.395576	213
10935	PRDX3	644	1632	0.394608	214
201799	TMEM154	1214	3085	0.393517	215
4478	MSN	1571	3994	0.39334	216
56913	C1GALT1	406	1033	0.39303	217
2182	ACSL4	2086	5321	0.392032	218
8301	PICALM	1459	3723	0.391888	219
7572	ZNF24	2566	6554	0.391517	220
7095	SEC62	2561	6550	0.390992	221
222068	TMED4	230	592	0.388514	222
64710	NUCKS1	2493	6453	0.386332	223
330	BIRC3	2011	5229	0.384586	224
116068	LYSMD3	1635	4260	0.383803	225
6309	SC5DL	3450	9048	0.3813	226
10914	PAPOLA	2237	5880	0.380442	227
8878	SQSTM1	1355	3577	0.378809	228
2113	ETS1	2081	5497	0.37857	229
2581	GALC	1605	4249	0.377736	230
221079	ARL5B	1355	3589	0.377542	231
7525	YES1	1826	4843	0.377039	232
801	CALM1	1667	4425	0.376723	233
950	SCARB2	1771	4704	0.376488	234
79718	TBL1XR1	2464	6550	0.376183	235
961	CD47	1979	5300	0.373396	236
84641	HIATL1	1221	3309	0.368994	237
6711	SPTBN1	5180	14174	0.365458	238
10313	RTN3	947	2596	0.364792	239
6734	SRPR	1072	2953	0.363021	240
55573	CDV3	1511	4180	0.361483	241
10983	CCNI	678	1885	0.359682	242
51727	CMPK1	1218	3389	0.359398	243
5782	PTPN12	1173	3306	0.354809	244
55858	TMEM165	599	1698	0.352768	245
7035	TFPI	1454	4151	0.350277	246
196	AHR	2070	5947	0.348075	247
84272	YIPF4	655	1883	0.347849	248
55332	DRAM	1232	3543	0.347728	249
7532	YWHAG	1290	3713	0.347428	250
51124	IER3IP1	514	1481	0.347063	251
6307	SC4MOL	743	2151	0.345421	252
81614	NIPA2	789	2288	0.344843	253
11034	DSTN	595	1735	0.342939	254
7803	PTP4A1	2004	5855	0.342272	255
8826	IQGAP1	2466	7213	0.341883	256
29957	SLC25A24	1271	3722	0.341483	257
81555	YIPF5	1175	3453	0.340284	258
1213	CLTC	2905	8538	0.340244	259
7046	TGFBR1	2194	6505	0.337279	260
29766	TMOD3	1245	3702	0.336305	261
27	ABL2	4059	12071	0.33626	262
79627	OGFRL1	672	2000	0.336	263
9643	MORF4L2	990	2950	0.335593	264
81537	SGPP1	1109	3308	0.335248	265
84896	ATAD1	1109	3308	0.335248	266
10613	ERLIN1	1121	3353	0.334327	267
3491	CYR61	161	485	0.331959	268
10006	ABI1	1183	3576	0.330817	269
57045	TWSG1	1271	3844	0.330645	270
93380	TMEM32	1198	3648	0.328399	271
3093	UBE2K	1722	5247	0.328188	272
10097	ACTR2	1268	3871	0.327564	273
5376	PMP22	660	2018	0.327056	274
9375	TM9SF2	781	2389	0.326915	275
1317	SLC31A1	1537	4718	0.325774	276
4673	NAP1L1	1217	3756	0.324015	277
6526	SLC5A3	3687	11400	0.323421	278
4735	SEPT2	1491	4615	0.323077	279
162073	ITPRIPL2	2476	7671	0.322774	280
4247	MGAT2	872	2711	0.321653	281
51449	PCYOX1	1727	5377	0.321183	282
2531	KDSR	1650	5140	0.321012	283
54502	RBM47	1688	5260	0.320913	284
127933	UHMK1	1178	3692	0.319068	285
51430	C1orf9	1800	5655	0.318302	286
1956	EGFR	2292	7243	0.316443	287
6138	RPL15	667	2111	0.315964	288
5358	PLS3	985	3123	0.315402	289
3187	HNRNPH1	604	1918	0.314911	290
829	CAPZA1	864	2749	0.314296	291
23365	ARHGEF12	2946	9386	0.313872	292
10890	RAB10	1110	3540	0.313559	293
5806	PTX3	607	1938	0.313209	294
51474	LIMA1	1206	3853	0.313003	295
51719	CAB39	1164	3735	0.311647	296
81567	TXNDC5	917	2976	0.308132	297
54431	DNAJC10	1510	4951	0.304989	298
7414	VCL	1607	5286	0.304011	299
9334	B4GALT5	1434	4727	0.303364	300
9867	PJA2	1476	4869	0.303142	301
114882	OSBPL8	2365	7806	0.302972	302
9052	GPRC5A	1076	3556	0.302587	303
6678	SPARC	974	3222	0.302297	304
203547	LOC203547	1417	4688	0.302261	305
10413	YAP1	1586	5259	0.301578	306
54495	TXNDC10	1406	4667	0.301264	307
10944	C11orf58	488	1624	0.300493	308
4076	CAPRIN1	2134	7116	0.299888	309
23585	TMEM50A	685	2288	0.299388	310
9991	ROD1	2230	7450	0.299329	311
2250	FGF5	1611	5389	0.298942	312
4853	NOTCH2	3331	11178	0.297996	313
51762	RAB8B	1451	4875	0.297641	314
5573	PRKAR1A	1374	4618	0.297531	315
23118	MAP3K7IP2	1279	4301	0.297373	316
3490	IGFBP7	332	1118	0.296959	317
7003	TEAD1	2761	9300	0.296882	318
6868	ADAM17	1143	3857	0.296344	319
167227	DCP2	2647	8947	0.295853	320
9317	PTER	1119	3793	0.295017	321
6648	SOD2	409	1390	0.294245	322
51026	GOLT1B	860	2928	0.293716	323
400	ARL1	937	3202	0.29263	324
9695	EDEM1	1829	6259	0.292219	325
80854	SETD7	1990	6810	0.292217	326
1075	CTSC	2202	7538	0.29212	327
51141	INSIG2	752	2587	0.290684	328
966	CD59	2301	7919	0.290567	329
5814	PURB	2635	9069	0.29055	330
283464	GLT8D3	2016	6949	0.290114	331
55041	PLEKHB2	1243	4291	0.289676	332
7756	ZNF207	1337	4628	0.288894	333
55069	C7orf42	1224	4242	0.288543	334
1362	CPD	2314	8029	0.288205	335
5660	PSAP	841	2920	0.288014	336
22931	RAB18	852	2959	0.287935	337
84910	TMEM87B	843	2933	0.287419	338
23369	PUM2	1773	6226	0.284774	339
23327	NEDD4L	1610	5656	0.284653	340
54602	NDFIP2	780	2758	0.282814	341
65059	RAPH1	2952	10446	0.282596	342
23731	C9orf5	2229	7894	0.282366	343
4233	MET	1878	6676	0.281306	344
8473	OGT	1498	5341	0.280472	345
23768	FLRT2	2004	7179	0.279148	346
1974	EIF4A2	331	1188	0.27862	347
55500	ETNK1	2026	7306	0.277306	348
55366	LGR4	1453	5247	0.27692	349
1902	LPAR1	902	3261	0.276602	350
9354	UBE4A	1688	6140	0.274919	351
5062	PAK2	1591	5788	0.274879	352
497661	C18orf32	310	1128	0.274823	353
1595	CYP51A1	780	2854	0.273301	354
60	ACTB	579	2130	0.271831	355
92597	MOBKL1A	2286	8415	0.271658	356
22998	LIMCH1	1905	7027	0.271097	357
4071	TM4SF1	970	3583	0.270723	358
160760	PPTC7	1014	3748	0.270544	359
586	BCAT1	2350	8692	0.270364	360
4856	NOV	703	2601	0.270281	361
3939	LDHA	548	2038	0.268891	362
24145	PANX1	744	2768	0.268786	363
4124	MAN2A1	1423	5304	0.268288	364
80829	ZFP91	1233	4603	0.267869	365
205428	C3orf58	1096	4092	0.26784	366
51569	UFM1	661	2468	0.267828	367
928	CD9	433	1620	0.267284	368
6272	SORT1	1874	7022	0.266876	369
6884	TAF13	159	597	0.266332	370
5054	SERPINE1	1537	5775	0.266147	371
3181	HNRNPA2B1	977	3676	0.265778	372
595	CCND1	1139	4289	0.265563	373
10611	PDLIM5	2105	7945	0.264947	374
2799	GNS	1389	5246	0.264773	375
253782	LASS6	1651	6263	0.263612	376
10150	MBNL2	1128	4302	0.262204	377
51582	AZIN1	1107	4227	0.261888	378
64065	PERP	509	1945	0.261697	379
64844	MARCH7	939	3595	0.261196	380
55884	WSB2	743	2846	0.261068	381
28972	SPCS1	286	1096	0.260949	382
5538	PPT1	624	2402	0.259784	383
81688	C6orf62	624	2405	0.259459	384
5868	RAB5A	606	2338	0.259196	385
10787	NCKAP1	1203	4646	0.258932	386
2123	EVI2A	407	1572	0.258906	387
3964	LGALS8	836	3239	0.258104	388
4677	NARS	696	2704	0.257396	389
10099	TSPAN3	469	1825	0.256986	390
8073	PTP4A2	555	2162	0.256707	391
10776	ARPP-19	1351	5272	0.256259	392
55000	TUG1	2001	7821	0.25585	393
54940	OCIAD1	527	2066	0.255082	394
10473	HMGN4	501	1968	0.254573	395
677	ZFP36L1	769	3022	0.254467	396
9019	MPZL1	952	3760	0.253191	397
222658	KCTD20	1269	5014	0.253091	398
25800	SLC39A6	930	3679	0.252786	399
5887	RAD23B	1044	4130	0.252785	400
83641	FAM107B	1048	4153	0.252348	401
3344	FOXN2	1376	5467	0.251692	402
120103	SLC36A4	621	2469	0.251519	403
7430	EZR	824	3278	0.251373	404
7105	TSPAN6	521	2073	0.251327	405
858	CAV2	829	3301	0.251136	406
26278	SACS	3913	15639	0.250208	407
9792	SERTAD2	1385	5547	0.249685	408
11098	PRSS23	1458	5845	0.249444	409
10009	ZBTB33	1299	5209	0.249376	410
665	BNIP3L	898	3606	0.249029	411
253943	YTHDF3	1310	5279	0.248153	412
1266	CNN3	518	2090	0.247847	413
25912	C1orf43	458	1850	0.247568	414
3703	STT3A	610	2464	0.247565	415
153830	RNF145	430	1737	0.247553	416
9601	PDIA4	728	2955	0.246362	417
908	CCT6A	663	2696	0.24592	418
55706	TMEM48	624	2540	0.245669	419
10114	HIPK3	1149	4680	0.245513	420
25978	CHMP2B	645	2632	0.245061	421
6738	TROVE2	1809	7401	0.244426	422
9497	SLC4A7	1918	7865	0.243865	423
10725	NFAT5	3665	15109	0.242571	424
9969	MED13	2369	9781	0.242204	425
5515	PPP2CA	643	2662	0.241548	426
382	ARF6	950	3939	0.241178	427
27069	GHITM	608	2521	0.241174	428
26298	EHF	872	3617	0.241084	429
60685	ZFAND3	716	2972	0.240915	430
10979	FERMT2	820	3407	0.240681	431
51571	FAM49B	509	2116	0.240548	432
134429	STARD4	533	2219	0.240198	433
23607	CD2AP	1294	5409	0.239231	434
9562	MINPP1	681	2854	0.238612	435
8411	EEA1	1907	8003	0.238286	436
80124	VCPIP1	1947	8176	0.238136	437
4238	MFAP3	685	2885	0.237435	438
387263	C6orf120	984	4146	0.237337	439
10096	ACTR3	644	2718	0.236939	440
57089	ENTPD7	2005	8469	0.236746	441
394	ARHGAP5	2290	9675	0.236693	442
140609	NEK7	301	1272	0.236635	443
85365	ALG2	666	2830	0.235336	444
10627	MRCL3	302	1284	0.235202	445
26092	TOR1AIP1	901	3842	0.234513	446
80218	NAT13	834	3576	0.233221	447
51201	ZDHHC2	890	3817	0.233167	448
28962	OSTM1	1041	4471	0.232834	449
51439	FAM8A1	1088	4677	0.232628	450
26225	ARL5A	739	3180	0.23239	451
11217	AKAP2	639	2752	0.232195	452
387914	SHISA2	670	2889	0.231914	453
7321	UBE2D1	614	2651	0.231611	454
80351	TNKS2	1412	6156	0.22937	455
23215	BAT2D1	2386	10410	0.229203	456
353376	TICAM2	823	3593	0.229056	457
3920	LAMP2	2150	9401	0.228699	458
9554	SEC22B	416	1821	0.228446	459
6426	SFRS1	1289	5647	0.228263	460
54499	TMCO1	940	4122	0.228045	461
92181	UBTD2	683	3015	0.226534	462
27248	C2orf30	711	3139	0.226505	463
8976	WASL	1001	4422	0.226368	464
3156	HMGCR	1012	4479	0.225943	465
93487	MAPK1IP1L	1461	6469	0.225846	466
10628	TXNIP	661	2927	0.225828	467
196527	ANO6	1380	6134	0.224976	468
286451	YIPF6	270	1202	0.224626	469
5781	PTPN11	1477	6577	0.22457	470
10527	IPO7	703	3132	0.224457	471
9406	ZRANB2	602	2684	0.224292	472
4015	LOX	436	1947	0.223934	473
64645	HIAT1	591	2645	0.22344	474
166929	SGMS2	475	2127	0.223319	475
8766	RAB11A	535	2397	0.223196	476
169200	TMEM64	840	3768	0.22293	477
134553	C5orf24	947	4258	0.222405	478
113251	LARP4	1467	6627	0.221367	479
26503	SLC17A5	734	3318	0.221218	480
4026	LPP	1578	7136	0.221132	481
10159	ATP6AP2	450	2036	0.221022	482
8323	FZD6	863	3910	0.220716	483
51029	FAM152A	903	4096	0.220459	484
7879	RAB7A	494	2250	0.219556	485
285636	C5orf51	1147	5225	0.219522	486
79752	ZFAND1	318	1451	0.219159	487
5861	RAB1A	546	2500	0.2184	488
5663	PSEN1	586	2692	0.217682	489
3383	ICAM1	707	3250	0.217538	490
3842	TNPO1	1873	8645	0.216657	491
51522	TMEM14C	200	924	0.21645	492
51809	GALNT7	933	4311	0.216423	493
7326	UBE2G1	910	4208	0.216255	494
493869	GPX8	296	1370	0.216058	495
79868	ALG13	288	1333	0.216054	496
84188	FAR1	1113	5155	0.215907	497
7026	NR2F2	743	3443	0.2158	498
664	BNIP3	689	3196	0.215582	499
8560	DEGS1	483	2241	0.215529	500
91298	C12orf29	598	2778	0.215263	501
7048	TGFBR2	995	4628	0.214996	502
7980	TFPI2	258	1201	0.214821	503
29956	LASS2	570	2655	0.214689	504
79939	SLC35E1	1373	6397	0.214632	505
10479	SLC9A6	1016	4737	0.214482	506
10735	STAG2	1361	6385	0.213156	507
9868	TOMM70A	930	4364	0.213107	508
2665	GDI2	562	2639	0.212959	509
23325	KIAA1033	1239	5822	0.212813	510
6392	SDHD	281	1321	0.212718	511
1499	CTNNB1	582	2741	0.212331	512
84230	LRRC8C	1513	7144	0.211786	513
9805	SCRN1	1103	5211	0.211668	514
64327	LMBR1	1039	4916	0.211351	515
8793	TNFRSF10D	746	3536	0.210973	516
81034	SLC25A32	596	2827	0.210824	517
64795	RMND5A	671	3183	0.210807	518
23190	UBXN4	856	4063	0.210682	519
64841	GNPNAT1	825	3925	0.210191	520
2651	GCNT2	1274	6085	0.209367	521
7745	ZNF192	1125	5376	0.209263	522
3185	HNRNPF	662	3167	0.209031	523
22875	ENPP4	901	4311	0.209	524
6836	SURF4	641	3067	0.208999	525
28977	MRPL42	444	2127	0.208745	526
7019	TFAM	392	1879	0.208622	527
7073	TIAL1	968	4647	0.208306	528
55435	C4orf16	585	2809	0.208259	529
1739	DLG1	1034	4972	0.207965	530
57826	RAP2C	818	3937	0.207772	531
10123	ARL4C	832	4008	0.207585	532
22919	MAPRE1	525	2543	0.206449	533
9761	KIAA0152	1309	6349	0.206174	534
3658	IREB2	1283	6227	0.206038	535
9331	B4GALT6	969	4712	0.205645	536
1654	DDX3X	1290	6279	0.205447	537
64859	OBFC2A	411	2003	0.205192	538
836	CASP3	514	2506	0.205108	539
2004	ELK3	441	2151	0.205021	540
1495	CTNNA1	792	3865	0.204916	541
6397	SEC14L1	1041	5099	0.204158	542
865	CBFB	638	3133	0.203639	543
2920	CXCL2	243	1203	0.201995	544
1655	DDX5	521	2597	0.200616	545
8031	NCOA4	652	3261	0.199939	546
59277	NTN4	722	3615	0.199723	547
26524	LATS2	1102	5547	0.198666	548
5217	PFN2	437	2202	0.198456	549
51186	WBP5	216	1089	0.198347	550
2773	GNAI3	945	4782	0.197616	551
116211	TM4SF19	202	1024	0.197266	552
29968	PSAT1	434	2201	0.197183	553
6617	SNAPC1	505	2564	0.196958	554
113201	CASC4	808	4104	0.196881	555
51012	SLMO2	507	2582	0.196359	556
10092	ARPC5	389	1982	0.196266	557
9588	PRDX6	330	1682	0.196195	558
130074	FAM168B	1028	5241	0.196146	559
7358	UGDH	629	3214	0.195706	560
51699	VPS29	163	834	0.195444	561
301	ANXA1	470	2406	0.195345	562
60592	SCOC	402	2060	0.195146	563
1200	TPP1	648	3321	0.195122	564
23429	RYBP	867	4444	0.195095	565
5352	PLOD2	1077	5523	0.195003	566
8836	GGH	263	1350	0.194815	567
23333	DPY19L1	1074	5529	0.194249	568
9522	SCAMP1	1233	6408	0.192416	569
6443	SGCB	813	4229	0.192244	570
127018	LYPLAL1	373	1941	0.192169	571
23167	EFR3A	1032	5374	0.192036	572
57211	GPR126	1200	6257	0.191785	573
2280	FKBP1A	368	1920	0.191667	574
26135	SERBP1	1298	6775	0.191587	575
51566	ARMCX3	671	3506	0.191386	576
3575	IL7R	345	1804	0.191242	577
7533	YWHAH	394	2063	0.190984	578
331	XIAP	1608	8444	0.190431	579
55676	SLC30A6	494	2600	0.19	580
9510	ADAMTS1	879	4651	0.188992	581
643155	C5orf43	545	2890	0.188581	582
7837	PXDN	1360	7216	0.18847	583
160897	GPR180	741	3936	0.188262	584
201595	STT3B	558	2964	0.188259	585
5562	PRKAA1	957	5085	0.188201	586
54765	TRIM44	595	3166	0.187934	587
64750	SMURF2	728	3882	0.187532	588
2730	GCLM	578	3084	0.187419	589
64083	GOLPH3	501	2676	0.18722	590
144348	ZNF664	938	5012	0.187151	591
4734	NEDD4	1423	7610	0.186991	592
10730	YME1L1	1118	5982	0.186894	593
54664	TMEM106B	1200	6429	0.186654	594
2782	GNB1	588	3152	0.186548	595
64746	ACBD3	664	3565	0.186255	596
94101	ORMDL1	323	1739	0.185739	597
149041	RC3H1	2040	10996	0.185522	598
27230	SERP1	740	3993	0.185324	599
7422	VEGFA	753	4071	0.184967	600
6277	S100A6	129	698	0.184814	601
6102	RP2	706	3829	0.184382	602
1432	MAPK14	712	3865	0.184217	603
56929	FEM1C	1070	5813	0.18407	604
51592	TRIM33	1733	9423	0.183912	605
51552	RAB14	749	4092	0.18304	606
10015	PDCD6IP	1183	6479	0.18259	607
51123	ZNF706	505	2771	0.182245	608
900	CCNG1	451	2476	0.182149	609
1182	CLCN3	795	4366	0.182089	610
29979	UBQLN1	678	3725	0.182013	611
7335	UBE2V1	474	2606	0.181888	612
22887	FOXJ3	1024	5636	0.181689	613
60485	SAV1	550	3031	0.181458	614
51714	SELT	635	3501	0.181377	615
7178	TPT1	175	967	0.180972	616
54813	KLHL28	1065	5898	0.18057	617
221477	C6orf89	1289	7149	0.180305	618
23306	TMEM194A	1007	5586	0.180272	619
51128	SAR1B	224	1246	0.179775	620
6760	SS18	588	3280	0.179268	621
2040	STOM	551	3074	0.179245	622
9823	ARMCX2	535	2985	0.179229	623
8545	CGGBP1	839	4721	0.177717	624
79694	MANEA	709	3992	0.177605	625
1054	CEBPG	663	3736	0.177463	626
5898	RALA	494	2794	0.176807	627
64343	AZI2	577	3264	0.176777	628
3915	LAMC1	1222	6913	0.176768	629
23185	LARP5	1015	5749	0.176552	630
1073	CFL2	554	3140	0.176433	631
55207	ARL8B	527	2989	0.176313	632
7494	XBP1	504	2862	0.176101	633
5355	PLP2	163	929	0.175457	634
5066	PAM	694	3959	0.175297	635
57606	SLAIN2	1298	7415	0.175051	636
11260	XPOT	677	3871	0.17489	637
6431	SFRS6	651	3729	0.174578	638
9194	SLC16A7	665	3810	0.174541	639
1615	DARS	407	2334	0.174379	640
1656	DDX6	1041	5971	0.174343	641
1983	EIF5	1188	6817	0.17427	642
1848	DUSP6	490	2821	0.173697	643
57182	ANKRD50	1343	7763	0.173	644
55353	LAPTM4B	393	2281	0.172293	645
51193	ZNF639	564	3274	0.172266	646
1843	DUSP1	321	1870	0.171658	647
9528	TMEM59	542	3160	0.171519	648
219902	TMEM136	734	4284	0.171335	649
1398	CRK	410	2397	0.171047	650
3267	HRB	835	4886	0.170896	651
892	CCNC	370	2168	0.170664	652
2181	ACSL3	724	4266	0.169714	653
9532	BAG2	262	1545	0.169579	654
22890	ZBTB1	960	5668	0.169372	655
5743	PTGS2	804	4747	0.16937	656
10746	MAP3K2	836	4941	0.169197	657
8853	DDEF2	964	5711	0.168797	658
84333	PCGF5	1203	7127	0.168795	659
57493	HEG1	1569	9301	0.168692	660
54915	YTHDF1	548	3252	0.168512	661
5813	PURA	439	2614	0.167942	662
1810	DR1	536	3208	0.167082	663
5870	RAB6A	562	3375	0.166519	664
284611	FAM102B	889	5340	0.166479	665
9697	TRAM2	1184	7118	0.166339	666
55186	SLC25A36	758	4560	0.166228	667
830	CAPZA2	425	2557	0.16621	668
57488	FAM62B	1225	7372	0.166169	669
2495	FTH1	215	1295	0.166023	670
5747	PTK2	781	4709	0.165853	671
3916	LAMP1	422	2546	0.16575	672
51000	SLC35B3	412	2486	0.165728	673
4144	MAT2A	515	3108	0.165701	674
10521	DDX17	754	4559	0.165387	675
80008	TMEM156	314	1902	0.165089	676
4084	MXD1	917	5556	0.165047	677
1633	DCK	405	2462	0.1645	678
1647	GADD45A	222	1355	0.163838	679
23443	SLC35A3	402	2461	0.163348	680
23484	LEPROTL1	442	2712	0.162979	681
64398	MPP5	933	5727	0.162913	682
84146	ZNF644	454	2787	0.162899	683
118429	ANTXR2	524	3219	0.162783	684
79745	CLIP4	731	4495	0.162625	685
142891	SAMD8	248	1525	0.162623	686
648	BMI1	483	2973	0.162462	687
9877	ZC3H11A	960	5911	0.162409	688
118987	PDZD8	623	3837	0.162366	689
23760	PITPNB	471	2901	0.162358	690
1603	DAD1	113	697	0.162123	691
6386	SDCBP	597	3688	0.161876	692
55284	UBE2W	647	4006	0.161508	693
54891	INO80D	2282	14136	0.161432	694
10146	G3BP1	459	2853	0.160883	695
152559	PAQR3	601	3739	0.160738	696
3192	HNRNPU	1223	7625	0.160393	697
7993	UBXN8	220	1372	0.16035	698
4090	SMAD5	1139	7104	0.160332	699
9748	SLK	884	5517	0.160232	700
55279	ZNF654	794	4957	0.160178	701
53339	BTBD1	526	3290	0.159878	702
5584	PRKCI	766	4796	0.159716	703
7099	TLR4	878	5501	0.159607	704
26065	LSM14A	573	3592	0.159521	705
1635	DCTD	325	2042	0.159158	706
9972	NUP153	906	5696	0.159059	707
55745	C14orf108	384	2423	0.158481	708
4154	MBNL1	1172	7402	0.158336	709
253832	ZDHHC20	231	1460	0.158219	710
5048	PAFAH1B1	888	5614	0.158176	711
29967	LRP12	768	4856	0.158155	712
85463	ZC3H12C	1234	7820	0.157801	713
22862	FNDC3A	1190	7543	0.157762	714
80328	ULBP2	212	1346	0.157504	715
5728	PTEN	873	5547	0.157382	716
122809	SOCS4	1082	6883	0.157199	717
11335	CBX3	296	1886	0.156946	718
3646	EIF3E	359	2288	0.156906	719
8540	AGPS	1202	7681	0.15649	720
134266	GRPEL2	641	4105	0.156151	721
8204	NRIP1	1138	7292	0.156061	722
360023	ZBTB41	1320	8474	0.155771	723
219988	PATL1	646	4148	0.155738	724
51125	GOLGA7	326	2096	0.155534	725
427	ASAH1	478	3074	0.155498	726
5074	PAWR	305	1964	0.155295	727
51701	NLK	445	2868	0.15516	728
90874	ZNF697	788	5080	0.155118	729
25945	PVRL3	379	2444	0.155074	730
80143	RP5-1000E10.4	853	5503	0.155006	731
1836	SLC26A2	1251	8075	0.154923	732
10487	CAP1	435	2808	0.154915	733
55312	RFK	419	2707	0.154784	734
50486	G0S2	149	963	0.154725	735
23219	FBXO28	453	2928	0.154713	736
23089	PEG10	1023	6617	0.154602	737
122830	NAT12	691	4475	0.154413	738
23172	FAM175B	460	2992	0.153743	739
9709	HERPUD1	448	2914	0.153741	740
151011	SEPT10	778	5063	0.153664	741
171546	C14orf147	389	2534	0.153512	742
3612	IMPA1	356	2322	0.153316	743
2151	F2RL2	522	3410	0.153079	744
9559	VPS26A	418	2731	0.153057	745
84803	AGPAT9	430	2813	0.152862	746
23479	ISCU	131	858	0.152681	747
6432	SFRS7	322	2110	0.152607	748
257194	NEGR1	913	5988	0.152472	749
8895	CPNE3	813	5335	0.15239	750
8915	BCL10	496	3257	0.152287	751
7320	UBE2B	406	2673	0.151889	752
26091	HERC4	654	4308	0.151811	753
7165	TPD52L2	360	2379	0.151324	754
1861	TOR1A	526	3478	0.151236	755
9603	NFE2L3	430	2848	0.150983	756
6427	SFRS2	435	2882	0.150937	757
115548	FCHO2	738	4890	0.15092	758
23512	SUZ12	670	4441	0.150867	759
7764	ZNF217	849	5635	0.150665	760
205327	C2orf69	554	3678	0.150625	761
11057	ABHD2	1321	8777	0.150507	762
6897	TARS	432	2871	0.15047	763
259230	SGMS1	565	3767	0.149987	764
55173	MRPS10	325	2170	0.14977	765
6780	STAU1	518	3459	0.149754	766
26009	ZZZ3	673	4496	0.149689	767
154007	C6orf151	986	6591	0.149598	768
3183	HNRNPC	462	3092	0.149418	769
8724	SNX3	219	1467	0.149284	770
84295	PHF6	715	4802	0.148896	771
1315	COPB1	523	3513	0.148876	772
7705	ZNF146	574	3856	0.148859	773
57223	SMEK2	577	3885	0.14852	774
11235	PDCD10	198	1335	0.148315	775
4780	NFE2L2	423	2853	0.148265	776
9097	USP14	618	4171	0.148166	777
64225	ARL6IP2	425	2869	0.148135	778
10010	TANK	337	2281	0.147742	779
90843	TCEAL8	179	1212	0.14769	780
84955	NUDCD1	605	4097	0.147669	781
6513	SLC2A1	556	3767	0.147598	782
4082	MARCKS	633	4291	0.147518	783
5547	PRCP	326	2210	0.147511	784
996	CDC27	828	5618	0.147383	785
8804	CREG1	299	2029	0.147363	786
55151	TMEM38B	305	2076	0.146917	787
5128	PCTK2	593	4041	0.146746	788
54951	COMMD8	207	1411	0.146704	789
79794	C12orf49	407	2775	0.146667	790
51290	ERGIC2	261	1781	0.146547	791
56829	ZC3HAV1	1173	8033	0.146023	792
8649	MAP2K1IP1	206	1411	0.145996	793
4040	LRP6	1471	10083	0.145889	794
8202	NCOA3	1159	7967	0.145475	795
8829	NRP1	1433	9851	0.145467	796
1545	CYP1B1	749	5153	0.145352	797
56180	MOSPD1	346	2382	0.145256	798
23527	CENTB2	1032	7116	0.145025	799
84928	TMEM209	483	3332	0.144958	800
23741	EID1	303	2091	0.144907	801
51465	UBE2J1	629	4342	0.144864	802
6428	SFRS3	327	2260	0.14469	803
10085	EDIL3	431	2979	0.144679	804
221830	TWISTNB	563	3892	0.144656	805
51274	KLF3	790	5464	0.144583	806
528	ATP6V1C1	824	5708	0.144359	807
81573	ANKRD13C	708	4911	0.144166	808
23468	CBX5	1705	11827	0.144162	809
54704	PPM2C	619	4304	0.14382	810
57157	PHTF2	890	6191	0.143757	811
9802	DAZAP2	273	1902	0.143533	812
153339	TMEM167A	240	1673	0.143455	813
204851	HIPK1	1225	8557	0.143158	814
5286	PIK3C2A	1169	8167	0.143137	815
5504	PPP1R2	459	3209	0.143035	816
122553	TRAPPC6B	484	3384	0.143026	817
79026	AHNAK	2755	19263	0.14302	818
5878	RAB5C	237	1659	0.142857	819
5718	PSMD12	269	1891	0.142253	820
8027	STAM	415	2918	0.142221	821
7779	SLC30A1	287	2018	0.14222	822
125144	C17orf45	154	1083	0.142198	823
10622	POLR3G	467	3285	0.142161	824
26043	UBXN7	673	4736	0.142103	825
51309	ARMCX1	303	2133	0.142053	826
54733	SLC35F2	830	5843	0.14205	827
81929	SEH1L	499	3514	0.142003	828
9295	SFRS11	653	4604	0.141833	829
5049	PAFAH1B2	170	1201	0.141549	830
51088	KLHL5	644	4552	0.141476	831
10802	SEC24A	903	6387	0.141381	832
9060	PAPSS2	546	3862	0.141378	833
161742	SPRED1	1025	7255	0.141282	834
64417	C5orf28	420	2974	0.141224	835
56910	STARD7	484	3428	0.14119	836
5494	PPM1A	513	3635	0.141128	837
54732	TMED9	158	1120	0.141071	838
144455	E2F7	771	5468	0.141002	839
6670	SP3	599	4257	0.140709	840
3673	ITGA2	1104	7869	0.140297	841
824	CAPN2	696	4961	0.140294	842
3313	HSPA9	466	3327	0.140066	843
3190	HNRNPK	424	3033	0.139796	844
23197	FAF2	635	4543	0.139775	845
51320	MEX3C	527	3781	0.139381	846
5911	RAP2A	606	4349	0.139342	847
440145	C13orf37	336	2412	0.139303	848
9685	CLINT1	787	5650	0.139292	849
10657	KHDRBS1	489	3515	0.139118	850
147991	DPY19L3	719	5178	0.138857	851
60496	AASDHPPT	398	2879	0.138242	852
9966	TNFSF15	286	2069	0.138231	853
51426	POLK	518	3749	0.13817	854
10560	SLC19A2	446	3228	0.138166	855
56681	SAR1A	429	3105	0.138164	856
8738	CRADD	164	1188	0.138047	857
79971	GPR177	436	3160	0.137975	858
143888	KDELC2	567	4113	0.137856	859
8562	DENR	424	3084	0.137484	860
54462	KIAA1128	1077	7871	0.136831	861
9926	LPGAT1	963	7038	0.136829	862
201931	TMEM192	616	4506	0.136707	863
1486	CTBS	267	1956	0.136503	864
221037	JMJD1C	1454	10655	0.136462	865
22936	ELL2	825	6050	0.136364	866
8030	CCDC6	846	6217	0.136078	867
6612	SUMO3	235	1728	0.135995	868
9734	HDAC9	1033	7600	0.135921	869
96459	FNIP1	876	6448	0.135856	870
23271	CAMSAP1L1	998	7351	0.135764	871
51100	SH3GLB1	865	6373	0.135729	872
153443	SRFBP1	386	2846	0.135629	873
256691	MAMDC2	487	3595	0.135466	874
25963	TMEM87A	551	4072	0.135314	875
57185	NPAL3	690	5116	0.134871	876
10640	EXOC5	1234	9172	0.13454	877
29035	C16orf72	535	3979	0.134456	878
6744	SSFA2	757	5632	0.134411	879
8507	ENC1	740	5517	0.134131	880
10668	CGRRF1	154	1149	0.13403	881
94081	SFXN1	618	4612	0.133998	882
55751	TMEM184C	398	2973	0.133872	883
149371	EXOC8	682	5097	0.133804	884
9653	HS2ST1	1043	7803	0.133667	885
22858	ICK	920	6901	0.133314	886
10794	ZNF460	513	3849	0.133281	887
10558	SPTLC1	803	6026	0.133256	888
23011	RAB21	350	2627	0.133232	889
27430	MAT2B	485	3644	0.133095	890
57092	PCNP	269	2024	0.132905	891
54149	C21orf91	721	5433	0.132708	892
10026	PIGK	735	5542	0.132624	893
286148	DPY19L4	827	6242	0.13249	894
4779	NFE2L1	646	4876	0.132486	895
667	DST	3634	27478	0.132251	896
9314	KLF4	374	2830	0.132155	897
23200	ATP11B	932	7057	0.132067	898
5634	PRPS2	334	2530	0.132016	899
79101	JOSD3	167	1268	0.131703	900
80255	SLC35F5	404	3069	0.131639	901
5516	PPP2CB	259	1974	0.131206	902
79577	CDC73	391	2984	0.131032	903
51187	C15orf15	179	1367	0.130944	904
152006	RNF38	708	5410	0.130869	905
8661	EIF3A	695	5313	0.130811	906
80219	COQ10B	259	1980	0.130808	907
5037	PEBP1	195	1491	0.130785	908
27161	EIF2C2	458	3503	0.130745	909
10678	B3GNT2	359	2749	0.130593	910
7336	UBE2V2	199	1524	0.130577	911
10927	SPIN1	608	4657	0.130556	912
5955	RCN2	223	1713	0.130181	913
9221	NOLC1	518	3989	0.129857	914
9813	KIAA0494	791	6095	0.129779	915
84541	KBTBD8	606	4680	0.129487	916
153222	C5orf41	513	3969	0.129252	917
10402	ST3GAL6	278	2151	0.129242	918
2107	ETF1	463	3585	0.129149	919
389677	RBM12B	659	5104	0.129114	920
132	ADK	282	2185	0.129062	921
65986	ZBTB10	781	6061	0.128857	922
54439	RBM27	814	6319	0.128818	923
51528	C14orf100	271	2104	0.128802	924
1434	CSE1L	387	3006	0.128743	925
52	ACP1	185	1438	0.128651	926
132864	CPEB2	713	5546	0.128561	927
316	AOX1	635	4949	0.128309	928
55829	SELS	240	1871	0.128274	929
10484	SEC23A	493	3845	0.128218	930
2778	GNAS	1054	8228	0.128099	931
2218	FKTN	955	7456	0.128085	932
310	ANXA7	274	2142	0.127918	933
3459	IFNGR1	272	2128	0.12782	934
8450	CUL4B	728	5696	0.127809	935
65124	ANKRD57	594	4654	0.127632	936
57403	RAB22A	1104	8655	0.127556	937
10606	PAICS	446	3498	0.127501	938
5532	PPP3CB	516	4050	0.127407	939
6059	ABCE1	535	4210	0.127078	940
91137	SLC25A46	295	2328	0.126718	941
81631	MAP1LC3B	288	2274	0.126649	942
51247	PAIP2	311	2459	0.126474	943
23186	RCOR1	698	5519	0.126472	944
10614	HEXIM1	605	4785	0.126437	945
9444	QKI	1400	11079	0.126365	946
8036	SHOC2	365	2893	0.126167	947
23446	SLC44A1	696	5518	0.126133	948
56911	C21orf7	282	2236	0.126118	949
7528	YY1	330	2618	0.12605	950
29966	STRN3	500	3974	0.125818	951
94134	ARHGAP12	567	4511	0.125693	952
2967	GTF2H3	190	1513	0.125578	953
23509	POFUT1	770	6135	0.125509	954
114799	ESCO1	565	4503	0.125472	955
23049	SMG1	1940	15476	0.125355	956
5412	UBL3	462	3689	0.125237	957
148423	C1orf52	152	1214	0.125206	958
116496	FAM129A	887	7110	0.124754	959
4077	NBR1	907	7292	0.124383	960
9637	FEZ2	270	2176	0.124081	961
9765	ZFYVE16	810	6533	0.123986	962
55144	LRRC8D	438	3533	0.123974	963
26509	FER1L3	839	6768	0.123966	964
23075	SWAP70	580	4680	0.123932	965
5817	PVR	376	3038	0.123766	966
55591	VEZT	595	4815	0.123572	967
10971	YWHAQ	278	2252	0.123446	968
9736	USP34	1377	11158	0.123409	969
7531	YWHAE	224	1816	0.123348	970
5420	PODXL	782	6341	0.123324	971
9821	RB1CC1	823	6675	0.123296	972
56886	UGCGL1	824	6684	0.123279	973
6451	SH3BGRL	221	1794	0.123188	974
27236	ARFIP1	380	3090	0.122977	975
5795	PTPRJ	1113	9057	0.122888	976
128338	TMEM77	260	2117	0.122815	977
1386	ATF2	314	2562	0.12256	978
1958	EGR1	384	3136	0.122449	979
10447	FAM3C	311	2542	0.122345	980
3182	HNRNPAB	213	1743	0.122203	981
22856	CHSY1	554	4535	0.122161	982
23244	PDS5A	930	7633	0.121839	983
11160	ERLIN2	611	5022	0.121665	984
2825	GPR1	282	2318	0.121657	985
253558	LYCAT	818	6724	0.121654	986
79647	AKIRIN1	239	1967	0.121505	987
10564	ARFGEF2	1094	9004	0.121502	988
9208	LRRFIP1	586	4824	0.121476	989
23160	WDR43	426	3509	0.121402	990
134430	WDR36	800	6596	0.121286	991
25948	KBTBD2	444	3668	0.121047	992
3422	IDI1	439	3631	0.120903	993
10228	STX6	557	4609	0.120851	994
998	CDC42	366	3029	0.120832	995
9404	LPXN	222	1841	0.120587	996
2530	FUT8	503	4174	0.120508	997
6789	STK4	764	6342	0.120467	998
9411	ARHGAP29	1043	8661	0.120425	999
9550	ATP6V1G1	194	1611	0.120422	1000
8693	GALNT4	641	5346	0.119903	1001
10553	HTATIP2	247	2061	0.119845	1002
11103	KRR1	404	3372	0.11981	1003
2923	PDIA3	369	3081	0.119766	1004
5328	PLAU	271	2264	0.1197	1005
5305	PIP4K2A	459	3837	0.119625	1006
3320	HSP90AA1	538	4508	0.119343	1007
9213	XPR1	541	4534	0.119321	1008
79161	C7orf23	129	1082	0.119224	1009
375	ARF1	271	2277	0.119016	1010
4609	MYC	318	2676	0.118834	1011
79139	DERL1	694	5842	0.118795	1012
10492	SYNCRIP	544	4594	0.118415	1013
201626	PDE12	463	3914	0.118293	1014
9689	BZW1	355	3004	0.118176	1015
9698	PUM1	671	5678	0.118175	1016
23545	ATP6V0A2	579	4911	0.117899	1017
6801	STRN	410	3479	0.11785	1018
22836	RHOBTB3	688	5842	0.117768	1019
54482	CCDC76	337	2862	0.11775	1020
7110	TMF1	809	6879	0.117604	1021
157769	FAM91A1	626	5324	0.117581	1022
3074	HEXB	296	2518	0.117554	1023
1318	SLC31A2	186	1584	0.117424	1024
6248	RSC1A1	217	1854	0.117044	1025
323	APBB2	560	4792	0.116861	1026
800	CALD1	604	5184	0.116512	1027
64924	SLC30A5	305	2619	0.116457	1028
54108	CHRAC1	290	2500	0.116	1029
255520	ELMOD2	150	1294	0.11592	1030
5230	PGK1	335	2890	0.115917	1031
10653	SPINT2	185	1600	0.115625	1032
55032	SLC35A5	340	2944	0.115489	1033
139231	CXorf39	347	3005	0.115474	1034
9167	COX7A2L	218	1890	0.115344	1035
10190	TXNDC9	228	1980	0.115152	1036
9917	FAM20B	685	5953	0.115068	1037
9367	RAB9A	114	992	0.114919	1038
4946	OAZ1	163	1421	0.114708	1039
6809	STX3	337	2944	0.11447	1040
182	JAG1	659	5766	0.114291	1041
79872	CBLL1	218	1909	0.114196	1042
54708	MARCH5	448	3926	0.114111	1043
284996	RNF149	364	3190	0.114107	1044
9943	OXSR1	516	4526	0.114008	1045
157378	TMEM65	491	4307	0.114	1046
116254	C6orf72	127	1117	0.113697	1047
9341	VAMP3	251	2212	0.113472	1048
3015	H2AFZ	209	1843	0.113402	1049
55660	PRPF40A	854	7563	0.112918	1050
3945	LDHB	147	1307	0.112471	1051
7058	THBS2	680	6046	0.112471	1052
91452	ACBD5	462	4108	0.112463	1053
10049	DNAJB6	404	3606	0.112035	1054
6383	SDC2	391	3490	0.112034	1055
143662	MUC15	287	2563	0.111978	1056
3189	HNRNPH3	259	2313	0.111976	1057
84962	JUB	531	4743	0.111954	1058
7112	TMPO	506	4526	0.111798	1059
6879	TAF7	256	2295	0.111547	1060
23291	FBXW11	499	4477	0.111459	1061
9575	CLOCK	717	6438	0.11137	1062
28234	SLCO1B3	351	3153	0.111323	1063
4074	M6PR	279	2507	0.111288	1064
59345	GNB4	715	6428	0.111232	1065
8898	MTMR2	503	4527	0.111111	1066
5599	MAPK8	213	1917	0.111111	1067
159	ADSS	308	2773	0.111071	1068
3845	KRAS	587	5297	0.110817	1069
7162	TPBG	291	2626	0.110815	1070
2632	GBE1	347	3137	0.110615	1071
84102	SLC41A2	267	2417	0.110468	1072
51660	BRP44L	106	960	0.110417	1073
56648	EIF5A2	611	5537	0.110349	1074
6421	SFPQ	344	3125	0.11008	1075
3484	IGFBP1	182	1654	0.110036	1076
1389	CREBL2	412	3748	0.109925	1077
10427	SEC24B	499	4545	0.109791	1078
6667	SP1	840	7657	0.109704	1079
329	BIRC2	462	4228	0.109272	1080
11167	FSTL1	396	3624	0.109272	1081
54165	DCUN1D1	344	3152	0.109137	1082
80018	C12orf30	608	5572	0.109117	1083
548645	DNAJC25	247	2268	0.108907	1084
151987	PPP4R2	160	1470	0.108844	1085
3309	HSPA5	425	3908	0.108751	1086
11056	DDX52	522	4801	0.108727	1087
2339	FNTA	520	4785	0.108673	1088
10945	KDELR1	205	1888	0.108581	1089
23389	MED13L	1039	9580	0.108455	1090
6342	SCP2	291	2684	0.10842	1091
64224	HERPUD2	333	3072	0.108398	1092
22903	BTBD3	540	4983	0.108368	1093
253260	RICTOR	1370	12709	0.107798	1094
8615	USO1	414	3848	0.107588	1095
9774	BCLAF1	780	7263	0.107394	1096
389136	VGLL3	1115	10396	0.107253	1097
54532	USP53	584	5456	0.107038	1098
29927	SEC61A1	418	3909	0.106933	1099
3428	IFI16	358	3350	0.106866	1100
4193	MDM2	210	1966	0.106816	1101
54521	WDR44	439	4114	0.106709	1102
29072	SETD2	885	8298	0.106652	1103
57534	MIB1	1013	9512	0.106497	1104
5935	RBM3	134	1259	0.106434	1105
144108	SPTY2D1	610	5734	0.106383	1106
29896	TRA2A	169	1590	0.106289	1107
219771	CCNY	454	4273	0.106249	1108
11215	AKAP11	1044	9835	0.106151	1109
8446	DUSP11	167	1577	0.105897	1110
10390	CEPT1	240	2267	0.105867	1111
163859	C1orf55	425	4015	0.105853	1112
6049	RNF6	440	4164	0.105668	1113
9801	MRPL19	845	8002	0.105599	1114
9749	PHACTR2	1006	9536	0.105495	1115
9043	SPAG9	471	4467	0.10544	1116
6815	STYX	273	2591	0.105365	1117
7514	XPO1	712	6771	0.105154	1118
79832	QSER1	1006	9577	0.105043	1119
2746	GLUD1	312	2971	0.105015	1120
9936	CD302	392	3745	0.104673	1121
387921	NHLRC3	559	5341	0.104662	1122
3308	HSPA4	356	3405	0.104552	1123
8634	RTCD1	171	1640	0.104268	1124
11080	DNAJB4	233	2237	0.104157	1125
7341	SUMO1	159	1527	0.104126	1126
9690	UBE3C	509	4890	0.10409	1127
51499	TRIAP1	123	1182	0.104061	1128
55291	SAPS3	714	6863	0.104036	1129
79071	ELOVL6	315	3029	0.103995	1130
79188	TMEM43	519	4994	0.103925	1131
57179	KIAA1191	297	2859	0.103882	1132
1997	ELF1	371	3576	0.103747	1133
51251	NT5C3	180	1735	0.103746	1134
51060	TXNDC12	160	1543	0.103694	1135
57551	TAOK1	928	8964	0.103525	1136
5876	RABGGTB	138	1335	0.103371	1137
51567	TTRAP	204	1975	0.103291	1138
1894	ECT2	409	3962	0.103231	1139
27348	TOR1B	300	2910	0.103093	1140
286410	ATP11C	630	6118	0.102975	1141
55197	RPRD1A	440	4275	0.102924	1142
55326	AGPAT5	575	5593	0.102807	1143
8539	API5	370	3601	0.102749	1144
5007	OSBP	523	5092	0.10271	1145
3148	HMGB2	190	1850	0.102703	1146
11329	STK38	430	4192	0.102576	1147
51652	VPS24	319	3111	0.102539	1148
3099	HK2	727	7093	0.102495	1149
10818	FRS2	710	6935	0.102379	1150
10808	HSPH1	389	3807	0.10218	1151
8050	PDHX	233	2282	0.102103	1152
51643	TMBIM4	187	1832	0.102074	1153
10209	EIF1	150	1472	0.101902	1154
1514	CTSL1	175	1722	0.101626	1155
51527	C14orf129	210	2067	0.101597	1156
1371	CPOX	273	2695	0.101299	1157
200894	ARL13B	377	3725	0.101208	1158
22928	SEPHS2	230	2273	0.101188	1159
6016	RIT1	346	3425	0.101022	1160
8887	TAX1BP1	334	3310	0.100906	1161
6249	CLIP1	601	5957	0.10089	1162
8795	TNFRSF10B	433	4294	0.100838	1163
25843	MOBKL3	291	2889	0.100727	1164
51199	NIN	1144	11395	0.100395	1165
56907	SPIRE1	550	5480	0.100365	1166
80232	WDR26	689	6869	0.100306	1167
2635	GBP3	294	2932	0.100273	1168
57472	CNOT6	619	6176	0.100227	1169
27249	C2orf25	185	1846	0.100217	1170
116461	TSEN15	198	1978	0.100101	1171
3005	H1F0	233	2330	0.1	1172
64866	CDCP1	624	6241	0.099984	1173
3454	IFNAR1	609	6094	0.0999344	1174
1965	EIF2S1	417	4180	0.0997608	1175
23394	ADNP	470	4713	0.0997242	1176
5725	PTBP1	344	3461	0.0993932	1177
80856	KIAA1715	572	5770	0.0991334	1178
23367	LARP1	739	7456	0.0991148	1179
283635	FAM177A1	310	3132	0.0989783	1180
10443	N4BP2L2	382	3865	0.0988357	1181
51202	DDX47	193	1953	0.0988223	1182
29071	C1GALT1C1	164	1663	0.098617	1183
5033	P4HA1	270	2742	0.0984683	1184
4976	OPA1	578	5871	0.09845	1185
8678	BECN1	187	1900	0.0984211	1186
54467	ANKIB1	598	6081	0.0983391	1187
10771	ZMYND11	436	4442	0.098154	1188
989	SEPT7	296	3016	0.0981432	1189
10658	CUGBP1	539	5496	0.0980713	1190
81671	TMEM49	136	1388	0.0979827	1191
57700	FAM160B1	562	5740	0.0979094	1192
7337	UBE3A	508	5193	0.097824	1193
5682	PSMA1	173	1774	0.0975197	1194
153642	ARSK	326	3345	0.0974589	1195
10525	HYOU1	434	4455	0.0974186	1196
10929	SFRS2B	422	4333	0.0973921	1197
10109	ARPC2	287	2952	0.0972222	1198
79602	ADIPOR2	386	3973	0.0971558	1199
6950	TCP1	246	2536	0.0970032	1200
51388	NIP7	222	2289	0.0969856	1201
51164	DCTN4	405	4177	0.0969595	1202
6891	TAP2	1802	18588	0.0969443	1203
154807	VKORC1L1	404	4169	0.0969057	1204
6091	ROBO1	917	9465	0.0968833	1205
79780	CCDC82	264	2730	0.0967033	1206
7763	ZFAND5	554	5735	0.0965998	1207
60313	GPBP1L1	505	5233	0.096503	1208
2908	NR3C1	760	7879	0.0964589	1209
53344	CHIC1	666	6909	0.096396	1210
2803	GOLGA4	750	7781	0.0963886	1211
306	ANXA3	173	1796	0.0963252	1212
51646	YPEL5	273	2835	0.0962963	1213
138199	C9orf41	211	2193	0.0962152	1214
10438	C1D	101	1051	0.096099	1215
5601	MAPK9	186	1936	0.0960744	1216
7739	ZNF185	396	4123	0.0960466	1217
55671	SMEK1	542	5649	0.0959462	1218
23184	MESDC2	407	4243	0.0959227	1219
10797	MTHFD2	210	2194	0.0957156	1220
10970	CKAP4	278	2905	0.0956971	1221
901	CCNG2	510	5336	0.0955772	1222
157567	ANKRD46	319	3347	0.0953092	1223
7082	TJP1	701	7357	0.0952834	1224
7570	ZNF22	243	2552	0.0952194	1225
4297	MLL	1177	12366	0.0951803	1226
5962	RDX	484	5086	0.0951632	1227
135112	NCOA7	458	4813	0.0951589	1228
55974	RAG1AP1	130	1367	0.0950988	1229
79770	TXNDC15	350	3689	0.0948767	1230
3021	H3F3B	264	2788	0.0946915	1231
54887	UHRF1BP1	912	9633	0.0946746	1232
10409	BASP1	170	1797	0.0946021	1233
51510	CHMP5	289	3062	0.0943828	1234
2512	FTL	133	1410	0.0943262	1235
7411	VBP1	171	1813	0.0943188	1236
54726	OTUD4	701	7444	0.0941698	1237
1456	CSNK1G3	410	4354	0.0941663	1238
91775	FAM55C	358	3809	0.0939879	1239
8239	USP9X	1167	12420	0.0939614	1240
57459	GATAD2B	702	7476	0.0939005	1241
7555	CNBP	320	3408	0.0938967	1242
388650	FAM69A	244	2599	0.0938823	1243
10284	SAP18	190	2025	0.0938272	1244
9857	CEP350	1305	13920	0.09375	1245
466	ATF1	230	2454	0.0937245	1246
10884	MRPS30	170	1820	0.0934066	1247
51371	POMP	123	1317	0.0933941	1248
7247	TSN	310	3321	0.0933454	1249
5906	RAP1A	176	1889	0.093171	1250
9262	STK17B	158	1699	0.0929959	1251
151188	ARL6IP6	219	2360	0.0927966	1252
3836	KPNA1	722	7785	0.0927425	1253
51573	GDE1	274	2969	0.092287	1254
10342	TFG	194	2108	0.0920304	1255
57132	CHMP1B	117	1272	0.0919811	1256
3486	IGFBP3	242	2635	0.0918406	1257
94239	H2AFV	432	4704	0.0918367	1258
23269	MGA	983	10708	0.0918005	1259
29058	C20orf30	146	1591	0.0917662	1260
10728	PTGES3	205	2237	0.0916406	1261
1915	EEF1A1	349	3810	0.091601	1262
5530	PPP3CA	400	4371	0.0915122	1263
4085	MAD2L1	126	1379	0.0913706	1264
8761	PABPC4	273	2988	0.0913655	1265
23299	BICD2	586	6416	0.0913342	1266
3553	IL1B	119	1305	0.0911877	1267
261726	TIPRL	294	3227	0.0911063	1268
25853	WDR40A	331	3635	0.0910591	1269
57583	TMEM181	597	6568	0.0908952	1270
10140	TOB1	192	2115	0.0907801	1271
51645	PPIL1	155	1710	0.0906433	1272
23353	UNC84A	556	6136	0.0906128	1273
5586	PKN2	596	6578	0.090605	1274
11236	RNF139	300	3312	0.0905797	1275
10000	AKT3	352	3887	0.0905583	1276
29978	UBQLN2	299	3306	0.0904416	1277
9166	EBAG9	169	1869	0.0904227	1278
3312	HSPA8	190	2102	0.0903901	1279
51304	ZDHHC3	239	2646	0.090325	1280
5825	ABCD3	324	3599	0.090025	1281
28966	SNX24	195	2169	0.0899032	1282
2965	GTF2H1	315	3504	0.0898973	1283
26224	FBXL3	312	3475	0.0897842	1284
23469	PHF3	463	5164	0.0896592	1285
3516	RBPJ	263	2935	0.0896082	1286
29068	ZBTB44	944	10547	0.0895041	1287
22990	PCNX	1130	12630	0.0894695	1288
9948	WDR1	420	4698	0.0893997	1289
11183	MAP4K5	552	6185	0.0892482	1290
56674	TMEM9B	156	1753	0.0889903	1291
5829	PXN	364	4095	0.0888889	1292
57205	ATP10D	559	6311	0.0885755	1293
79699	ZYG11B	567	6404	0.0885384	1294
11244	ZHX1	444	5015	0.0885344	1295
85403	EAF1	397	4488	0.0884581	1296
3895	KTN1	477	5397	0.0883824	1297
11120	BTN2A1	275	3113	0.0883392	1298
51228	GLTP	208	2356	0.0882852	1299
10299	MARCH6	397	4507	0.0880852	1300
91749	KIAA1919	345	3918	0.0880551	1301
10184	LHFPL2	614	6974	0.0880413	1302
688	KLF5	311	3533	0.0880272	1303
1824	DSC2	457	5199	0.0879015	1304
57691	KIAA1586	252	2867	0.0878968	1305
57683	ZDBF2	891	10146	0.0878179	1306
401474	SAMD12	917	10445	0.0877932	1307
51132	RNF12	291	3316	0.0877563	1308
6185	RPN2	205	2341	0.0875694	1309
133	ADM	154	1760	0.0875	1310
3269	HRH1	414	4732	0.0874894	1311
9218	VAPA	613	7015	0.0873842	1312
120534	C11orf46	187	2141	0.0873424	1313
51021	MRPS16	231	2648	0.0872356	1314
84293	C10orf58	138	1583	0.0871762	1315
58478	ENOPH1	173	1985	0.0871537	1316
121536	AEBP2	505	5807	0.086964	1317
9728	KIAA0256	601	6914	0.0869251	1318
262	AMD1	298	3429	0.0869058	1319
7424	VEGFC	181	2083	0.0868939	1320
10019	SH2B3	469	5409	0.0867073	1321
27436	EML4	492	5695	0.0863916	1322
5627	PROS1	269	3120	0.0862179	1323
130507	UBR3	681	7903	0.0861698	1324
5271	SERPINB8	326	3786	0.0861067	1325
58487	CREBZF	628	7304	0.0859803	1326
23161	SNX13	600	6986	0.0858861	1327
55183	RIF1	748	8711	0.0858684	1328
4942	OAT	166	1941	0.0855229	1329
2317	FLNB	795	9303	0.0854563	1330
57665	RDH14	131	1533	0.0854534	1331
8934	RAB7L1	217	2544	0.0852987	1332
51703	ACSL5	321	3764	0.0852816	1333
7871	SLMAP	426	4997	0.0852512	1334
23314	SATB2	619	7263	0.0852265	1335
3281	HSBP1	161	1894	0.0850053	1336
8813	DPM1	102	1201	0.0849292	1337
643853	FLJ45032	329	3879	0.0848157	1338
1452	CSNK1A1	137	1616	0.0847772	1339
51696	HECA	476	5621	0.0846824	1340
26190	FBXW2	767	9077	0.0844993	1341
84888	SPPL2A	170	2012	0.084493	1342
57498	KIDINS220	613	7266	0.0843655	1343
6120	RPE	212	2515	0.0842942	1344
347902	AMIGO2	317	3763	0.0842413	1345
157506	RDH10	238	2826	0.084218	1346
8780	RIOK3	355	4222	0.0840834	1347
26057	ANKRD17	798	9502	0.0839823	1348
7257	TSNAX	224	2670	0.0838951	1349
8731	RNMT	519	6224	0.0833869	1350
51318	MRPL35	276	3311	0.0833585	1351
1027	CDKN1B	200	2404	0.0831947	1352
135114	HINT3	281	3379	0.0831607	1353
55331	PHCA	365	4391	0.0831246	1354
1121	CHM	452	5442	0.0830577	1355
9931	HELZ	1132	13632	0.0830399	1356
23390	ZDHHC17	396	4771	0.0830015	1357
348235	FAM33A	255	3080	0.0827922	1358
7416	VDAC1	171	2068	0.0826886	1359
6683	SPAST	431	5213	0.0826779	1360
56647	BCCIP	264	3198	0.0825516	1361
6558	SLC12A2	837	10153	0.0824387	1362
1026	CDKN1A	149	1812	0.0822296	1363
4719	NDUFS1	284	3455	0.0821997	1364
4863	NPAT	333	4059	0.0820399	1365
3716	JAK1	402	4907	0.0819238	1366
7324	UBE2E1	120	1466	0.0818554	1367
4121	MAN1A1	336	4121	0.0815336	1368
1665	DHX15	501	6148	0.0814899	1369
220988	HNRNPA3	474	5820	0.0814433	1370
9475	ROCK2	521	6401	0.0813935	1371
10048	RANBP9	253	3113	0.0812721	1372
9320	TRIP12	531	6545	0.0811306	1373
1737	DLAT	351	4329	0.0810811	1374
254225	RNF169	634	7823	0.0810431	1375
83930	STARD3NL	112	1382	0.081042	1376
64426	SUDS3	383	4728	0.0810068	1377
374986	FAM73A	658	8126	0.0809746	1378
223	ALDH9A1	202	2500	0.0808	1379
22841	RAB11FIP2	489	6059	0.0807064	1380
23142	DCUN1D4	339	4207	0.08058	1381
152137	CCDC50	156	1936	0.0805785	1382
11231	SEC63	524	6504	0.0805658	1383
5194	PEX13	142	1763	0.0805445	1384
56900	TMEM167B	453	5625	0.0805333	1385
10768	AHCYL1	346	4300	0.0804651	1386
116064	LRRC58	618	7683	0.0804373	1387
27342	RABGEF1	391	4865	0.08037	1388
6662	SOX9	316	3934	0.0803254	1389
54926	UBE2R2	358	4457	0.0803231	1390
26258	PLDN	346	4321	0.0800741	1391
221395	GPR116	482	6023	0.0800266	1392
9669	EIF5B	376	4706	0.079898	1393
253461	ZBTB38	696	8719	0.0798257	1394
84365	MKI67IP	133	1670	0.0796407	1395
57570	TRMT5	420	5281	0.0795304	1396
55740	ENAH	1082	13606	0.0795237	1397
4155	MBP	546	6866	0.0795223	1398
5638	PRRG1	356	4481	0.0794466	1399
80155	NARG1	441	5554	0.0794022	1400
10152	ABI2	522	6580	0.0793313	1401
7150	TOP1	289	3645	0.0792867	1402
28996	HIPK2	1197	15128	0.0791248	1403
64089	SNX16	247	3124	0.0790653	1404
11079	RER1	253	3203	0.0789884	1405
200734	SPRED2	367	4654	0.0788569	1406
64112	MOAP1	196	2486	0.0788415	1407
55256	ADI1	132	1676	0.0787589	1408
84255	SLC37A3	251	3197	0.0785111	1409
6251	RSU1	298	3797	0.078483	1410
205717	KIAA2018	1077	13737	0.0784014	1411
1429	CRYZ	148	1891	0.0782655	1412
51105	PHF20L1	770	9839	0.07826	1413
57120	GOPC	372	4757	0.0782005	1414
3597	IL13RA1	375	4796	0.0781902	1415
1783	DYNC1LI2	340	4354	0.0780891	1416
84248	FYTTD1	275	3523	0.0780585	1417
9819	TSC22D2	297	3813	0.0778914	1418
30836	DNTTIP2	185	2380	0.0777311	1419
7360	UGP2	191	2458	0.0777055	1420
51765	RP6-213H19.1	254	3270	0.0776758	1421
8675	STX16	384	4959	0.077435	1422
492311	LOC492311	222	2871	0.077325	1423
9782	MATR3	635	8216	0.0772882	1424
54680	ZNHIT6	216	2797	0.0772256	1425
4659	PPP1R12A	519	6748	0.0769117	1426
23253	ANKRD12	809	10528	0.0768427	1427
3556	IL1RAP	423	5512	0.0767417	1428
9874	TLK1	474	6196	0.076501	1429
6009	RHEB	159	2079	0.0764791	1430
27333	GOLIM4	134	1754	0.0763968	1431
60558	GUF1	322	4216	0.0763757	1432
92912	UBE2Q2	222	2923	0.0759494	1433
5597	MAPK6	318	4189	0.0759131	1434
8334	HIST1H2AC	126	1661	0.0758579	1435
2957	GTF2A1	163	2152	0.0757435	1436
2124	EVI2B	151	1995	0.0756892	1437
54834	GDAP2	273	3611	0.0756023	1438
5594	MAPK1	460	6094	0.0754841	1439
143684	FAM76B	298	3951	0.0754239	1440
10950	BTG3	112	1485	0.0754209	1441
53981	CPSF2	372	4947	0.0751971	1442
23451	SF3B1	314	4177	0.0751736	1443
27107	ZBTB11	349	4651	0.0750376	1444
5537	PPP6C	317	4225	0.0750296	1445
678	ZFP36L2	277	3693	0.0750068	1446
476	ATP1A1	377	5036	0.074861	1447
5469	MED1	609	8148	0.0747423	1448
1385	CREB1	221	2957	0.0747379	1449
7707	ZNF148	713	9543	0.0747145	1450
5431	POLR2B	364	4873	0.0746973	1451
58533	SNX6	234	3134	0.074665	1452
26122	EPC2	273	3658	0.0746309	1453
71	ACTG1	163	2185	0.0745995	1454
905	CCNT2	339	4545	0.0745875	1455
8669	EIF3J	191	2562	0.0745511	1456
5411	PNN	269	3610	0.0745152	1457
10241	CALCOCO2	257	3460	0.0742775	1458
10957	PNRC1	220	2965	0.074199	1459
2935	GSPT1	192	2589	0.0741599	1460
324	APC	814	10993	0.0740471	1461
55802	DCP1A	444	6007	0.0739138	1462
7884	SLBP	129	1746	0.0738832	1463
8195	MKKS	205	2781	0.0737145	1464
83452	RAB33B	285	3868	0.0736815	1465
23243	ANKRD28	506	6871	0.0736428	1466
27246	RNF115	120	1630	0.0736196	1467
64764	CREB3L2	603	8200	0.0735366	1468
55749	CCAR1	287	3905	0.0734955	1469
4299	AFF1	680	9261	0.0734262	1470
6160	RPL31	228	3111	0.0732883	1471
2729	GCLC	448	6128	0.073107	1472
58517	RBM25	311	4257	0.0730561	1473
55862	ECHDC1	175	2397	0.0730079	1474
55319	C4orf43	140	1918	0.0729927	1475
57563	KLHL8	334	4576	0.0729895	1476
2617	GARS	202	2770	0.0729242	1477
10988	METAP2	252	3456	0.0729167	1478
54906	C10orf18	733	10073	0.0727688	1479
3977	LIFR	757	10403	0.0727675	1480
200879	LIPH	180	2474	0.0727567	1481
1047	CLGN	247	3396	0.0727326	1482
130340	AP1S3	281	3864	0.0727226	1483
25976	TIPARP	312	4302	0.0725244	1484
2820	GPD2	454	6274	0.0723621	1485
91851	CHRDL1	172	2383	0.0721779	1486
57630	SH3RF1	380	5265	0.0721747	1487
302	ANXA2	128	1774	0.0721533	1488
8065	CUL5	461	6391	0.0721327	1489
5791	PTPRE	493	6852	0.0719498	1490
55206	SBNO1	314	4376	0.071755	1491
9791	PTDSS1	180	2512	0.0716561	1492
23137	SMC5	427	5965	0.0715842	1493
23022	PALLD	524	7332	0.0714675	1494
55214	LEPREL1	248	3471	0.0714492	1495
23463	ICMT	344	4815	0.0714434	1496
55204	GOLPH3L	223	3127	0.0713144	1497
54811	ZNF562	412	5782	0.0712556	1498
23193	GANAB	282	3964	0.0711403	1499
140890	SFRS12	280	3941	0.071048	1500
9989	PPP4R1	283	3985	0.0710163	1501
55973	BCAP29	489	6890	0.0709724	1502
23499	MACF1	1606	22632	0.0709615	1503
8476	CDC42BPA	839	11826	0.0709454	1504
5465	PPARA	731	10311	0.0708952	1505
5711	PSMD5	240	3386	0.0708801	1506
64116	SLC39A8	247	3485	0.0708752	1507
91752	ZNF804A	332	4685	0.0708645	1508
7428	VHL	209	2952	0.0707995	1509
6314	ATXN7	442	6250	0.07072	1510
4800	NFYA	244	3456	0.0706019	1511
137492	VPS37A	148	2097	0.070577	1512
25923	ATL3	183	2593	0.0705746	1513
8322	FZD4	521	7383	0.0705675	1514
9871	SEC24D	470	6665	0.0705176	1515
63915	MUTED	160	2269	0.0705156	1516
26127	FGFR1OP2	162	2298	0.0704961	1517
5610	EIF2AK2	198	2809	0.0704877	1518
3927	LASP1	271	3849	0.0704079	1519
79134	TMEM185B	150	2131	0.0703895	1520
55704	CCDC88A	674	9579	0.0703623	1521
2932	GSK3B	112	1592	0.0703518	1522
84458	LCOR	340	4834	0.0703351	1523
103	ADAR	475	6757	0.0702975	1524
9318	COPS2	252	3585	0.0702929	1525
84640	USP38	240	3423	0.0701139	1526
26060	APPL1	425	6062	0.0701089	1527
125228	C18orf19	307	4384	0.0700274	1528
57448	BIRC6	1069	15274	0.0699882	1529
7334	UBE2N	179	2558	0.0699765	1530
27242	TNFRSF21	174	2487	0.0699638	1531
51444	RNF138	249	3567	0.0698066	1532
23609	MKRN2	193	2765	0.0698011	1533
1500	CTNND1	416	5960	0.0697987	1534
7171	TPM4	260	3725	0.0697987	1535
867	CBL	783	11227	0.0697426	1536
8848	TSC22D1	356	5108	0.0696946	1537
79884	MAP9	521	7486	0.0695966	1538
7323	UBE2D3	113	1624	0.0695813	1539
10512	SEMA3C	360	5174	0.0695787	1540
153129	SLC38A9	241	3465	0.0695527	1541
22800	RRAS2	180	2592	0.0694444	1542
25937	WWTR1	161	2319	0.0694265	1543
26269	FBXO8	178	2567	0.0693416	1544
23326	USP22	361	5220	0.0691571	1545
84668	FAM126A	424	6151	0.0689319	1546
7342	UBP1	278	4040	0.0688119	1547
840	CASP7	192	2798	0.0686204	1548
768211	RELL1	277	4038	0.0685983	1549
2135	EXTL2	198	2887	0.0685833	1550
79966	SCD5	294	4294	0.0684676	1551
26031	OSBPL3	442	6463	0.0683893	1552
7520	XRCC5	314	4599	0.0682757	1553
51382	ATP6V1D	174	2550	0.0682353	1554
10923	SUB1	110	1615	0.0681115	1555
2060	EPS15	450	6607	0.0681096	1556
5110	PCMT1	108	1586	0.0680958	1557
79886	C9orf82	195	2864	0.0680866	1558
55917	CTTNBP2NL	463	6803	0.0680582	1559
59342	SCPEP1	122	1795	0.0679666	1560
11052	CPSF6	450	6623	0.067945	1561
3843	IPO5	471	6941	0.0678577	1562
1778	DYNC1H1	1054	15555	0.0677596	1563
51306	FAM13B1	376	5554	0.067699	1564
8720	MBTPS1	341	5038	0.0676856	1565
3326	HSP90AB1	175	2586	0.0676721	1566
7675	ZNF121	117	1729	0.0676692	1567
3925	STMN1	130	1922	0.0676379	1568
10040	TOM1L1	133	1967	0.0676157	1569
5495	PPM1B	367	5435	0.0675253	1570
282809	WDR51B	213	3156	0.0674905	1571
55193	PBRM1	552	8184	0.0674487	1572
65056	GPBP1	238	3533	0.0673648	1573
26136	TES	183	2717	0.0673537	1574
8674	VAMP4	270	4015	0.0672478	1575
51	ACOX1	507	7552	0.0671345	1576
1808	DPYSL2	305	4549	0.0670477	1577
84280	BTBD10	168	2507	0.0670124	1578
3178	HNRNPA1	146	2180	0.0669725	1579
84612	PARD6B	309	4615	0.0669556	1580
29940	DSE	469	7012	0.0668853	1581
988	CDC5L	201	3006	0.0668663	1582
2332	FMR1	273	4085	0.0668299	1583
9197	SLC33A1	287	4296	0.0668063	1584
23272	C3orf63	523	7832	0.0667773	1585
23528	ZNF281	239	3581	0.0667411	1586
83877	TM2D2	211	3164	0.0666877	1587
7706	TRIM25	383	5744	0.0666783	1588
8821	INPP4B	265	3975	0.0666667	1589
150275	CCDC117	263	3945	0.0666667	1590
168850	ZNF800	283	4246	0.066651	1591
1407	CRY1	219	3294	0.0664845	1592
152519	NPAL1	150	2257	0.0664599	1593
23052	ENDOD1	309	4650	0.0664516	1594
55783	FTSJD1	277	4171	0.0664109	1595
339324	ZNF260	358	5395	0.0663577	1596
90161	HS6ST2	295	4447	0.0663369	1597
9337	CNOT8	186	2806	0.0662865	1598
9412	MED21	117	1766	0.0662514	1599
84959	UBASH3B	457	6907	0.0661648	1600
64420	SUSD1	198	2996	0.0660881	1601
79768	C15orf29	176	2666	0.0660165	1602
6418	SET	207	3137	0.0659866	1603
124808	CCDC43	141	2138	0.0659495	1604
54812	AFTPH	260	3952	0.0657895	1605
10483	SEC23B	243	3702	0.0656402	1606
6935	ZEB1	393	5992	0.0655874	1607
166968	MIER3	362	5532	0.0654375	1608
159090	FAM122B	253	3868	0.0654085	1609
359948	IRF2BP2	304	4663	0.0651941	1610
2697	GJA1	204	3130	0.0651757	1611
135293	PM20D2	307	4716	0.0650975	1612
8886	DDX18	246	3779	0.0650966	1613
3184	HNRNPD	140	2151	0.065086	1614
5581	PRKCE	361	5548	0.0650685	1615
9581	PREPL	315	4844	0.0650289	1616
79723	SUV39H2	200	3077	0.0649984	1617
8910	SGCE	113	1741	0.0649052	1618
2005	ELK4	239	3683	0.0648928	1619
3301	DNAJA1	114	1759	0.0648096	1620
7813	EVI5	480	7407	0.0648036	1621
55347	ABHD10	172	2655	0.0647834	1622
25921	ZDHHC5	318	4911	0.0647526	1623
9958	USP15	300	4646	0.0645717	1624
54443	ANLN	309	4786	0.0645633	1625
8725	C19orf2	147	2277	0.0645586	1626
2745	GLRX	107	1658	0.0645356	1627
55254	TMEM39A	191	2961	0.0645052	1628
28970	C11orf54	251	3894	0.0644581	1629
55699	IARS2	230	3570	0.0644258	1630
55300	PI4K2B	223	3462	0.0644136	1631
9180	OSMR	298	4630	0.0643629	1632
254065	BRWD3	390	6060	0.0643564	1633
83737	ITCH	415	6450	0.0643411	1634
65117	RSRC2	146	2270	0.0643172	1635
11342	RNF13	186	2892	0.0643154	1636
1955	MEGF9	383	5960	0.0642617	1637
51663	ZFR	304	4734	0.0642163	1638
25797	QPCT	110	1713	0.0642148	1639
114793	FMNL2	364	5669	0.0642089	1640
129642	MBOAT2	247	3847	0.0642059	1641
10285	SMNDC1	131	2043	0.0641214	1642
51715	RAB23	202	3152	0.0640863	1643
339745	SPOPL	366	5713	0.0640644	1644
375033	PEAR1	316	4942	0.0639417	1645
8690	JRKL	186	2914	0.0638298	1646
23405	DICER1	701	11001	0.0637215	1647
54665	RSBN1	420	6593	0.0637039	1648
9949	AMMECR1	376	5904	0.0636856	1649
8667	EIF3H	135	2120	0.0636792	1650
6654	SOS1	735	11543	0.063675	1651
1968	EIF2S3	221	3472	0.0636521	1652
6892	TAPBP	853	13412	0.0635998	1653
10434	LYPLA1	164	2580	0.0635659	1654
7159	TP53BP2	296	4657	0.0635602	1655
9538	EI24	145	2285	0.0634573	1656
8140	SLC7A5	288	4543	0.0633942	1657
11031	RAB31	253	3998	0.0632816	1658
831	CAST	327	5174	0.0632006	1659
79882	ZC3H14	291	4608	0.063151	1660
3839	KPNA3	281	4456	0.063061	1661
23341	DNAJC16	406	6441	0.0630337	1662
8543	LMO4	138	2209	0.0624717	1663
26035	GLCE	315	5043	0.0624628	1664
7844	RNF103	368	5901	0.0623623	1665
5899	RALB	141	2264	0.0622792	1666
9306	SOCS6	364	5846	0.0622648	1667
7319	UBE2A	185	2976	0.062164	1668
55088	C10orf118	342	5503	0.0621479	1669
54469	ZFAND6	101	1632	0.0618873	1670
55847	CISD1	128	2075	0.0616867	1671
60488	MRPS35	115	1877	0.061268	1672
6520	SLC3A2	158	2580	0.0612403	1673
6093	ROCK1	409	6681	0.0612184	1674
5567	PRKACB	515	8423	0.0611421	1675
22978	NT5C2	196	3208	0.0610973	1676
10575	CCT4	144	2358	0.0610687	1677
4289	MKLN1	855	14010	0.0610278	1678
136	ADORA2B	115	1885	0.061008	1679
4214	MAP3K1	441	7236	0.0609453	1680
5205	ATP8B1	354	5821	0.0608143	1681
150465	TTL	638	10491	0.060814	1682
53371	NUP54	143	2357	0.0606703	1683
546	ATRX	650	10719	0.06064	1684
9169	SFRS2IP	542	8938	0.06064	1685
23683	PRKD3	571	9438	0.0605001	1686
51768	TM7SF3	159	2630	0.0604563	1687
6434	SFRS10	392	6499	0.060317	1688
22948	CCT5	206	3417	0.0602868	1689
51316	PLAC8	161	2674	0.0602094	1690
84068	SLC10A7	228	3787	0.060206	1691
153396	TMEM161B	160	2659	0.060173	1692
148362	C1orf58	120	1997	0.0600901	1693
89795	NAV3	583	9716	0.0600041	1694
255488	RNF144B	286	4768	0.0599832	1695
57590	WDFY1	276	4607	0.0599088	1696
140838	NANP	140	2337	0.0599059	1697
10486	CAP2	182	3043	0.0598094	1698
9882	TBC1D4	369	6178	0.0597281	1699
26039	SS18L1	272	4554	0.0597277	1700
25897	RNF19A	259	4339	0.0596912	1701
5094	PCBP2	154	2581	0.0596668	1702
80012	PHC3	977	16410	0.0595369	1703
6228	RPS23	197	3314	0.0594448	1704
6542	SLC7A2	458	7705	0.0594419	1705
9240	PNMA1	157	2643	0.0594022	1706
3840	KPNA4	226	3806	0.0593799	1707
1839	HBEGF	139	2344	0.0593003	1708
55252	ASXL2	413	6965	0.0592965	1709
10576	CCT2	118	1991	0.0592667	1710
2132	EXT2	216	3646	0.059243	1711
57786	RBAK	388	6551	0.0592276	1712
56255	TXNDC13	140	2365	0.0591966	1713
4232	MEST	166	2807	0.0591379	1714
123811	C16orf63	133	2250	0.0591111	1715
25998	IBTK	361	6119	0.0589966	1716
5908	RAP1B	103	1747	0.0589582	1717
11051	NUDT21	260	4414	0.0589035	1718
10762	NUP50	267	4533	0.0589014	1719
51726	DNAJB11	131	2225	0.0588764	1720
7322	UBE2D2	159	2702	0.0588453	1721
9107	MTMR6	331	5627	0.0588235	1722
120	ADD3	325	5529	0.058781	1723
1832	DSP	571	9730	0.0586845	1724
143384	C10orf46	396	6748	0.0586841	1725
2776	GNAQ	276	4705	0.058661	1726
8491	MAP4K3	234	3991	0.0586319	1727
5034	P4HB	311	5310	0.0585687	1728
81603	TRIM8	162	2769	0.0585049	1729
9527	GOSR1	335	5728	0.0584846	1730
64429	ZDHHC6	207	3543	0.0584251	1731
10254	STAM2	329	5646	0.0582713	1732
10157	AASS	183	3151	0.0580768	1733
1975	EIF4B	233	4021	0.0579458	1734
5144	PDE4D	443	7657	0.0578556	1735
22889	KIAA0907	238	4121	0.057753	1736
1605	DAG1	318	5522	0.0575878	1737
56902	PNO1	114	1982	0.0575177	1738
283489	ZNF828	216	3762	0.0574163	1739
139322	APOOL	179	3119	0.0573902	1740
51108	METTL9	184	3208	0.0573566	1741
6125	RPL5	135	2354	0.0573492	1742
22872	SEC31A	327	5702	0.0573483	1743
55680	RUFY2	364	6354	0.0572867	1744
51133	KCTD3	225	3931	0.0572373	1745
9584	RBM39	202	3533	0.0571752	1746
90355	C5orf30	193	3378	0.0571344	1747
134510	UBLCP1	124	2178	0.056933	1748
3480	IGF1R	639	11242	0.0568404	1749
255919	TMEM188	116	2046	0.056696	1750
55165	CEP55	150	2649	0.0566251	1751
8436	SDPR	182	3221	0.0565042	1752
6675	UAP1	135	2390	0.0564854	1753
9014	TAF1B	117	2074	0.0564127	1754
6575	SLC20A2	210	3727	0.0563456	1755
3949	LDLR	301	5343	0.0563354	1756
3475	IFRD1	178	3161	0.0563113	1757
23633	KPNA6	415	7372	0.0562941	1758
7922	SLC39A7	415	7386	0.0561874	1759
345778	MTX3	560	9970	0.0561685	1760
23262	HISPPD1	289	5148	0.0561383	1761
8939	FUBP3	231	4117	0.0561088	1762
9452	ITM2A	103	1840	0.0559783	1763
1203	CLN5	227	4064	0.0558563	1764
26973	CHORDC1	115	2060	0.0558252	1765
92	ACVR2A	298	5345	0.055753	1766
10179	RBM7	107	1920	0.0557292	1767
472	ATM	754	13538	0.0556951	1768
375056	MIA3	472	8478	0.0556735	1769
9140	ATG12	164	2951	0.0555744	1770
1728	NQO1	144	2595	0.0554913	1771
83448	PUS7L	242	4362	0.0554791	1772
64397	ZFP106	588	10609	0.0554246	1773
51534	VTA1	180	3258	0.0552486	1774
4087	SMAD2	593	10735	0.0552399	1775
57599	WDR48	206	3737	0.0551244	1776
10380	BPNT1	141	2563	0.0550137	1777
22847	ZNF507	591	10745	0.0550023	1778
58508	MLL3	825	15005	0.0549817	1779
57380	MRS2	185	3370	0.0548961	1780
10282	BET1	168	3061	0.054884	1781
7259	TSPYL1	194	3535	0.0548798	1782
55785	FGD6	522	9525	0.0548031	1783
10745	PHTF1	205	3747	0.0547104	1784
282991	BLOC1S2	115	2102	0.0547098	1785
7453	WARS	188	3441	0.0546353	1786
26515	FXC1	155	2842	0.0545391	1787
9039	UBA3	116	2127	0.0545369	1788
10656	KHDRBS3	107	1970	0.0543147	1789
7153	TOP2A	310	5718	0.0542148	1790
127253	TYW3	129	2380	0.0542017	1791
84263	HSDL2	168	3106	0.0540889	1792
55629	PNRC2	128	2367	0.0540769	1793
5901	RAN	104	1925	0.054026	1794
23036	ZNF292	617	11438	0.053943	1795
55074	OXR1	303	5630	0.0538188	1796
50848	F11R	257	4782	0.0537432	1797
643314	KIAA0754	373	6979	0.0534461	1798
80723	TMEM22	110	2060	0.0533981	1799
54953	C1orf27	203	3803	0.0533789	1800
11101	ATE1	130	2436	0.0533662	1801
23376	KIAA0776	224	4199	0.053346	1802
81	ACTN4	208	3905	0.053265	1803
7203	CCT3	113	2124	0.0532015	1804
523	ATP6V1A	242	4549	0.0531985	1805
23788	MTCH2	133	2502	0.0531575	1806
10741	RBBP9	205	3857	0.0531501	1807
25831	HECTD1	548	10313	0.0531368	1808
3460	IFNGR2	112	2109	0.0531057	1809
23196	FAM120A	242	4558	0.0530935	1810
167153	PAPD4	187	3523	0.0530798	1811
5756	TWF1	176	3316	0.053076	1812
34	ACADM	141	2657	0.0530674	1813
23230	VPS13A	622	11721	0.0530671	1814
2069	EREG	239	4504	0.0530639	1815
7398	USP1	246	4638	0.0530401	1816
9321	TRIP11	386	7283	0.0530001	1817
8880	FUBP1	114	2157	0.0528512	1818
26234	FBXL5	179	3387	0.0528491	1819
55625	ZDHHC7	169	3198	0.0528455	1820
27032	ATP2C1	349	6608	0.0528148	1821
819	CAMLG	116	2199	0.0527513	1822
55727	BTBD7	494	9367	0.0527383	1823
6741	SSB	106	2012	0.0526839	1824
1845	DUSP3	217	4122	0.0526443	1825
132660	LIN54	327	6222	0.0525554	1826
8879	SGPL1	262	4997	0.0524315	1827
10186	LHFP	113	2158	0.0523633	1828
8550	MAPKAPK5	111	2120	0.0523585	1829
79598	CEP97	261	4996	0.0522418	1830
4194	MDM4	136	2609	0.0521273	1831
5563	PRKAA2	487	9352	0.0520744	1832
23431	AP4E1	349	6705	0.0520507	1833
6731	SRP72	212	4076	0.0520118	1834
200576	PIP5K3	533	10263	0.0519341	1835
2017	CTTN	208	4010	0.0518703	1836
4287	ATXN3	359	6923	0.0518561	1837
4089	SMAD4	433	8353	0.0518377	1838
163	AP2B1	299	5772	0.0518018	1839
144402	CPNE8	206	3981	0.0517458	1840
171586	ABHD3	216	4183	0.0516376	1841
94056	SYAP1	104	2016	0.0515873	1842
285672	SFRS12IP1	351	6805	0.0515797	1843
9516	LITAF	127	2464	0.0515422	1844
1827	RCAN1	152	2956	0.0514208	1845
3068	HDGF	143	2782	0.0514019	1846
10461	MERTK	186	3626	0.0512962	1847
5569	PKIA	112	2184	0.0512821	1848
79269	WDR32	406	7922	0.0512497	1849
9967	THRAP3	233	4548	0.0512313	1850
6480	ST6GAL1	232	4531	0.0512028	1851
6655	SOS2	266	5199	0.0511637	1852
64747	MFSD1	119	2329	0.0510949	1853
11099	PTPN21	317	6215	0.0510056	1854
54520	CCDC93	346	6798	0.0508973	1855
124583	CANT1	178	3502	0.0508281	1856
5604	MAP2K1	132	2597	0.0508279	1857
54764	ZRANB1	260	5116	0.050821	1858
8444	DYRK3	110	2167	0.0507614	1859
55145	THAP1	110	2167	0.0507614	1860
26032	SUSD5	254	5005	0.0507493	1861
153241	CEP120	226	4470	0.0505593	1862
90	ACVR1	157	3119	0.0503366	1863
10051	SMC4	282	5607	0.0502943	1864
254428	SLC41A1	263	5246	0.0501334	1865
11261	CHP	158	3155	0.0500792	1866
5770	PTPN1	166	3316	0.0500603	1867
6605	SMARCE1	190	3808	0.049895	1868
1859	DYRK1A	332	6655	0.0498873	1869
348995	NUP43	193	3869	0.0498837	1870
51377	UCHL5	189	3790	0.0498681	1871
9950	GOLGA5	145	2908	0.0498624	1872
51575	ESF1	160	3216	0.0497512	1873
22930	RAB3GAP1	208	4188	0.0496657	1874
90102	PHLDB2	228	4596	0.0496084	1875
4691	NCL	135	2722	0.0495959	1876
26115	TANC2	749	15114	0.0495567	1877
9818	NUPL1	453	9142	0.0495515	1878
8091	HMGA2	624	12617	0.0494571	1879
11196	SEC23IP	213	4334	0.0491463	1880
55119	PRPF38B	182	3713	0.049017	1881
4953	ODC1	102	2085	0.0489209	1882
4012	LNPEP	235	4807	0.048887	1883
5250	SLC25A3	155	3171	0.0488805	1884
10949	HNRNPA0	145	2967	0.0488709	1885
8672	EIF4G3	293	5997	0.0488578	1886
285359	LOC285359	121	2478	0.0488297	1887
9777	TM9SF4	183	3749	0.048813	1888
26064	RAI14	253	5198	0.0486726	1889
90693	CCDC126	123	2535	0.0485207	1890
51366	UBR5	426	8792	0.0484531	1891
11216	AKAP10	142	2932	0.0484311	1892
1977	EIF4E	120	2483	0.0483286	1893
23198	PSME4	344	7120	0.0483146	1894
10294	DNAJA2	151	3139	0.0481045	1895
23670	TMEM2	296	6157	0.0480754	1896
10236	HNRNPR	136	2830	0.0480565	1897
117584	RFFL	216	4495	0.0480534	1898
5318	PKP2	207	4311	0.0480167	1899
10769	PLK2	134	2793	0.0479771	1900
54778	RNF111	283	5920	0.0478041	1901
23613	ZMYND8	219	4582	0.0477957	1902
5042	PABPC3	116	2429	0.0477563	1903
139886	SPIN4	196	4112	0.0476654	1904
54465	ETAA1	156	3283	0.0475175	1905
5903	RANBP2	543	11434	0.0474899	1906
79892	C10orf119	233	4912	0.0474349	1907
54989	ZNF770	256	5403	0.0473811	1908
4820	NKTR	645	13628	0.047329	1909
115294	PCMTD1	198	4186	0.0473005	1910
2744	GLS	173	3659	0.0472807	1911
1981	EIF4G1	269	5690	0.0472759	1912
10210	TOPORS	196	4148	0.0472517	1913
51104	FAM108B1	154	3260	0.0472393	1914
65125	WNK1	438	9273	0.0472339	1915
8570	KHSRP	154	3264	0.0471814	1916
89797	NAV2	612	12988	0.0471204	1917
23074	UHRF1BP1L	258	5477	0.0471061	1918
399979	SNX19	279	5939	0.0469776	1919
8773	SNAP23	104	2216	0.0469314	1920
54014	BRWD1	794	16919	0.0469295	1921
65084	TMEM135	205	4382	0.0467823	1922
83693	HSDL1	163	3488	0.0467317	1923
57587	KIAA1430	222	4752	0.0467172	1924
10724	MGEA5	284	6098	0.0465726	1925
8850	KAT2B	225	4832	0.0465646	1926
80204	FBXO11	210	4515	0.0465116	1927
6515	SLC2A3	220	4734	0.0464723	1928
10276	NET1	166	3580	0.0463687	1929
87	ACTN1	287	6198	0.0463053	1930
84945	ABHD13	245	5302	0.046209	1931
1314	COPA	285	6171	0.0461838	1932
58155	PTBP2	284	6152	0.0461638	1933
79738	BBS10	165	3583	0.0460508	1934
4841	NONO	124	2697	0.045977	1935
90550	CCDC109A	156	3397	0.0459229	1936
6938	TCF12	220	4792	0.0459098	1937
25820	ARIH1	242	5274	0.0458855	1938
3482	IGF2R	417	9095	0.0458494	1939
10569	SLU7	171	3744	0.0456731	1940
48	ACO1	183	4008	0.0456587	1941
11108	PRDM4	192	4208	0.0456274	1942
79642	ARSJ	213	4678	0.0455323	1943
10311	DSCR3	145	3185	0.0455259	1944
55276	PGM2	144	3177	0.0453258	1945
84925	DIRC2	151	3347	0.045115	1946
7716	VEZF1	209	4651	0.0449366	1947
3725	JUN	149	3323	0.044839	1948
5797	PTPRM	238	5309	0.0448295	1949
23112	TNRC6B	817	18225	0.0448285	1950
8087	FXR1	128	2863	0.0447083	1951
22878	KIAA1012	269	6033	0.0445881	1952
27154	BRPF3	269	6046	0.0444922	1953
23531	MMD	121	2723	0.0444363	1954
23505	TMEM131	286	6447	0.0443617	1955
6651	SON	403	9092	0.0443247	1956
6430	SFRS5	191	4314	0.0442745	1957
5272	SERPINB9	180	4074	0.0441826	1958
59343	SENP2	142	3220	0.0440994	1959
2885	GRB2	146	3312	0.0440821	1960
83544	DNAL1	296	6732	0.0439691	1961
54876	C4orf30	199	4548	0.0437555	1962
4864	NPC1	208	4758	0.0437158	1963
54793	KCTD9	144	3294	0.0437158	1964
5801	PTPRR	183	4198	0.0435922	1965
3667	IRS1	215	4934	0.0435752	1966
23064	SETX	485	11132	0.0435681	1967
388677	NOTCH2NL	216	4962	0.0435308	1968
285282	RABL3	169	3883	0.043523	1969
11100	HNRNPUL1	177	4068	0.0435103	1970
142940	TRUB1	146	3356	0.0435042	1971
84549	MAK16	154	3540	0.0435028	1972
80146	UXS1	161	3703	0.0434783	1973
64318	NOC3L	137	3151	0.0434783	1974
9474	ATG5	141	3248	0.0434113	1975
817	CAMK2D	179	4126	0.0433834	1976
7586	ZKSCAN1	231	5340	0.0432584	1977
55333	SYNJ2BP	305	7060	0.0432011	1978
22848	AAK1	912	21163	0.0430941	1979
9462	RASAL2	223	5183	0.0430253	1980
2526	FUT4	255	5938	0.0429438	1981
2926	GRSF1	285	6637	0.0429411	1982
51520	LARS	310	7234	0.0428532	1983
84002	B3GNT5	204	4761	0.0428481	1984
55589	BMP2K	131	3063	0.0427685	1985
92255	LMBRD2	132	3092	0.0426908	1986
3106	HLA-B	190	4456	0.0426391	1987
157638	FAM84B	223	5232	0.0426223	1988
1519	CTSO	125	2933	0.0426185	1989
894	CCND2	276	6480	0.0425926	1990
221150	C13orf3	123	2888	0.04259	1991
1601	DAB2	204	4790	0.0425887	1992
9100	USP10	144	3386	0.0425281	1993
902	CCNH	184	4334	0.042455	1994
51633	OTUD6B	140	3298	0.04245	1995
54542	RC3H2	191	4503	0.0424162	1996
23136	EPB41L3	172	4059	0.042375	1997
[truncated: 501 more rows]
